# Supplementary material for: The HOMA-Adiponectin (HOMA-AD) Closely Mirrors the HOMA-IR Index in the Screening of Insulin Resistance in the Brazilian Metabolic Syndrome Study (BRAMS)
Source: PLoS One. 2016 Aug 4;11(8):e0158751. doi: 10.1371/journal.pone.0158751 (PMC4973901; doi:10.1371/journal.pone.0158751)
Supplement: S1 File — (XLSX) [file pone.0158751.s001.xlsx]

## Sheet: Data for Plos One
Age(years)	BMI(kg/m²)	Waist Circumference(cm)	Systolic blood pressure (mmHg)	Diastolic blood pressure (mmHg)	Triglycerides (mg/dl)	Total Cholesterol (mg/dl)	LDL (mg/dl)	HDL (mg/dl)	Glucose (mg/dl)	Insulin (mU/l)	Adiponectin (µg/ml)	HOMA-AD	HOMA-IR	Gamma GT (U/l)	CRP (mg/dl)	Metabolic Syndrome	Hyperglycemic clamp
29	33.01	100.7	120	80	114	168	96	49	96	11.45	3.09	0.88	2.71	25	1.7	No	Yes
23	21.93	74.7	90	60	95	175	77	79	86	11.94	6.55	0.39	2.53	11	0.32	No	Yes
40	32.77	101.7	110	70	87	193	131	45	72	6.57	3.4	0.34	1.16	14	0.15	No	Yes
46	31.73	103.1	150	90	68	208	130	64	97	4.09	3.554	0.27	0.97	46	0.57	No	Yes
49	41.24	121.9	120	90	106	224	149	54	109	27.78	2.661	2.81	7.48	74		No	Yes
34	41.33	111.5	120	80	228	220	103	71	87	16.33	3.588	0.98	3.52	19	1.67	No	Yes
40	39.32	118.6	130	100	47	142	82	51	85	12.8	1.6	1.68	2.7	14		Yes	Yes
45	29.96	95.3	130	90	71	123	63	46	86	12.5	1.671	1.59	2.65	15		Yes	Yes
35	43.43	121.4	130	90	100	169	107	42	97	5.98	1.901	0.75	1.43	28	0.19	Yes	Yes
30	41.22	125	112	70	123	195	124	46	87	3.48	1.51	0.5	0.75	23	0.38	No	Yes
36	31.76	105.3	120	70	456	260	135	34	99	23.37	1.149	4.95	5.68	115	0.43	Yes	Yes
43	36.44	115.2	160	110	215	226	139	44	121	17.41	1.5	3.47	5.2	25		Yes	Yes
44	39.67	122.3	150	90	121	165	102	39	97	16.2	2.29	1.69	3.87	27	0.82	Yes	Yes
38	33.37	105.5	120	80	141	208	133	46	94	15.4	1.54	2.32	3.58	83	0.4	No	Yes
44	40.43	126	100	70	154	164	93	40	90	12.49	1.25	2.21	2.77	22		Yes	Yes
62	30.74	93.4	160	100	122	190	118	48	96	10.1	3.34	0.72	2.39	16	0.39	Yes	Yes
29	21.44	82.8	110	70	53	195	114	70	89	10.75	5.64	0.42	2.35	8	0.12	No	Yes
54	31.43	104	130	90	129	201	120	55	101	7.59	2.717	0.7	1.89	8	0.1	Yes	Yes
54	26.78	79	120	60	104	184	120	43	90	7.96	3.116	0.57	1.76	17	0.33	No	Yes
27	22.88	80	100	70	56	117	55	51	84	7.97	3.27	0.51	1.66	13	0.08	No	Yes
26	21.48	72.5	110	70	51	154	93	51	85	7.59	5.75	0.28	1.59	13	0.07	No	Yes
26	30.83	95.8	100	70	84	178	85	76	90	7.03	6.119	0.25	1.56	21	0.4	No	Yes
41	20.7	81.2	130	90	115	206	147	36	86	7.3	4.29	0.36	1.55	15		Yes	Yes
29	29.11	99	110	70	58	159	93	54	89	6.53	4.722	0.3	1.43	14	0.42	No	Yes
29	21.26	86.2	100	70	57	146	86	49	94	5.39	6.41	0.19	1.25	13		No	Yes
37	23.94	77.9	110	80	51	176	101	65	103	4.91	3.09	0.4	1.25	11	0.06	No	Yes
39	19.45	80.7	90	60	50	156	88	58	90	4.46	4.1	0.24	0.99	12	0.07	No	Yes
57	20.76	76.5	90	60	61	187	84	91	81	4.71	5.098	0.18	0.94	18	0.09	No	Yes
52	21.99	83.1	100	80	181	213	126	51	90	3.83	6.02	0.14	0.85	14		No	Yes
24	30.05	89.3	90	65	50	141	82	49	80	4.16	5.411	0.15	0.82	9	0.15	No	Yes
28	23.21	84.6	100	70	48	162	78	74	75	4.37	5.42	0.15	0.81	21	0.07	No	Yes
61	23.65	81.5	110	80	77	191	115	61	76	4.27	11.511	0.07	0.8	19	0.28	No	Yes
60	24.81	88	120	70	109	229	150	57	73	3.75	5.098	0.13	0.67	12	0.2	No	Yes
24	23.26	84.1	120	80	69	178	118	46	81	3.15	5.13	0.12	0.63	10	0.07	No	Yes
40	26.1	92	110	90	47	192	118	65	90	2.56	9.369	0.06	0.57	13	0.25	No	Yes
40	26.1	92	110	90	47	192	118	65	86	2.59	3.5	0.16	0.55	13	0.25	No	Yes
26	21.84	77	120	80	75	154	86	53	78	1.5	3.79	0.08	0.29	8	0.07	No	Yes
62	32.45	105	120	80	155	226	160	35	108	15.91	3.304	1.28	4.24	29	1	Yes	Yes
22	23.36	84.9	110	70	218	190	85	61	81	15.61	4.55	0.69	3.12	54	2.08	No	Yes
47	23.06	81.7	110	80	144	235	164	42	100	12.06	3.03	0.98	2.97	10	0.05	No	Yes
46	28.22	93.7	130	80	233	219	133	39	96	9.57	1.12	2.02	2.26	48	0.47	Yes	Yes
61	29.56	93.3	120	80	80	170	93	61	81	8.27	1.119	1.48	1.65	18	0.59	No	Yes
34	30.63	103.3	100	70	57	140	71	58	92	5.65	1.6	0.8	1.28	11		No	Yes
35	24.58	85.3	120	80	98	153	66	67	82	5.69	2.31	0.5	1.16	18		No	Yes
47	33.99	106.3	110	60	97	193	120	54	91	4.22	1.97	0.48	0.95	17		No	Yes
63	25	92.9	100	70	51	181	118	53	77	4.09	2.055	0.38	0.78	11	0.05	No	Yes
51	20.74	74	112	80	53	200	105	84	72	2.09	2.239	0.17	0.37	8	0.02	No	Yes
24	19.4	72.5			104	190	118	51	74	5.5	3.49	0.29	1	16	0.7	No	Yes
20	25.9	82	128	86	149	202	109	63	72	12.6	1.84	1.22	2.24	9	0.46	No	Yes
34	27.55	92	100	60	147	185	103	53	91	12.08	5.299	0.51	2.71	22		No	No
36	32								110	9.96	2.852	0.95	2.71				No
35	26.43	93	100	70	101	159	91	48	89	12.3	3.41	0.79	2.7			No	No
28	21.03	79.5	90	60					84	13	2.71	0.99	2.7			No	No
35	31.62	97	120	90	131	130	53	51	112	9.74	2.66	1.01	2.69			Yes	No
51	29.19	100	120	80	109	219	138	59	79	13.8	5.57	0.48	2.69	22	0.13	No	No
27	29.97	76	127	83	96	166	84	63	75	14.5	2.82	0.95	2.69	62		No	No
38	45.04	117	110	70	85	159	94	48	85	12.78	3.15	0.85	2.68	20		No	No
40	29.52	103.2	110	80	107	246	160	65	87	12.46	3.42	0.78	2.68	47		No	No
29	25.33	92	120	80	116	157	112	22	84	12.9	2.66	1.01	2.68			No	No
42	30.33	82	110	80	143	271	207	35	83	13	3.21	0.83	2.66	43		No	No
19	33.65	104.5	112	90	107	158	100	37	81	13.3	9.15	0.29	2.66	70	0.98	No	No
20	27.39	87	100	60	136	204	136	41	81	13.3	6.58	0.4	2.66			No	No
64	31.23	99	146	89	99	168	110	38	111	9.7	8.47	0.31	2.66	20		Yes	No
40	36.5	106	122	88	76	188	116	57	74	14.5	4.15	0.64	2.65	55	0.93	No	No
23	20.49	75	90	50	83	216	96	103	83	12.9	4.32	0.61	2.64			No	No
25	34.88	107	100	80	63	146	82	51	75	14.26	3.091	0.85	2.64	29		No	No
21	34.48	87	140	90	64	159	91	55	92	11.6	4.2	0.63	2.64			No	No
22	26.24	94	110	70	87	196	140	39	85	12.5	3.02	0.87	2.62			No	No
28	29.41	97	100	80	207	188	89	58	85	12.43	8.9	0.29	2.61		22.53	No	No
36	26.71	97	110	70	80	156	92	48	84	12.56	3.431	0.76	2.61	8	0.22	No	No
43	27.92	79	100	70	121	235	172	39	90	11.7	5.71	0.46	2.6	45		No	No
31	27.29	75	110	70	240	223	107	68	72	14.6	5.44	0.48	2.6	14		No	No
51	36.16	112	137	87	107	206	137	48	75	14	5.36	0.48	2.59	16		No	No
30	25.68	89	100	70	156	148	81	36	102	10.29	4.43	0.59	2.59			Yes	No
46	26.17	86	128	90	138	271	186	57	88	11.9	3.89	0.66	2.59			No	No
32	41.04	112	140	99	132	168	96	46	115	9.1	3.26	0.79	2.58	24	0.91	Yes	No
44	33.79	107.5	120	90	152	149	77	42	72	14.5	3.21	0.8	2.58	50	0.26	Yes	No
19	39.88	104.2	120	82	84	153	99	37	70	14.8	2.91	0.88	2.56	15	0.6	No	No
41	26.46	91.5	100	60	77	223	165	43	80	12.9	3.27	0.78	2.55	29		No	No
25	40.84	109	120	90	152	197	125	42	86	12	3	0.85	2.55	29	0.43	Yes	No
22	27.98	95	120	80	39	146	95	44	89	11.56	10.424	0.24	2.54		1.21	Yes	No
35	27.11	84	90	60	125	189	116	48	83	12.39	14.445	0.18	2.54		3.88	No	No
23	24.98								74	13.85	7.403	0.34	2.53				No
30	23.88	80	120	80	88	196	132	46	80	12.8	4.37	0.58	2.53			No	No
20	25.3	85	120	80	83	182	119	46	88	11.6	8.98	0.28	2.52			No	No
56	21.87	92	110	70	90	157	83	56	89	11.45	3.293	0.76	2.52	76		No	No
35	29.28	92.3	120	84	50	123	63	50	76	13.4	3.65	0.69	2.51	22	1.38	No	No
50	43.87	122	140	80	135	155	96	32	92	11.05	3.33	0.75	2.51	17	0.11	No	No
25	32								110	9.24	4.901	0.51	2.51				No
37	24.59	69	105	80	103	192	113	58	80	12.7	5.66	0.44	2.51			No	No
22	20.39	78	120	90	89	190	85	87	80	12.7	4.76	0.53	2.51			No	No
37	25.88	99	120	80	66	235	143	79	71	14.3	2.94	0.85	2.51	36	1.35	No	No
18	18.86	80	100	60	67	171	119	38	78	12.98	18.9	0.13	2.5		0.33	No	No
61	24.23	87.5	110	70	107	189	106	62	88	11.4	3.92	0.63	2.48	19	0.1	No	No
31	34.05	109	115	80	145	212	137	46	85	11.77	2.912	0.85	2.47	26	0.19	No	No
30	30.36	88.7	110	80	56	201	136	54	81	12.3	6.42	0.38	2.46	9	0.18	No	No
50	37.19	104	130	90	86	166	91	58	87	11.4	2.425	1.01	2.45	19	0.23	No	No
19	19.88	65	120	80	91	141	58	65	121	8.19	4.92	0.5	2.45			No	No
47	38.62	109	130	80	106	168	65	82	98	10.1	3.957	0.62	2.44	27		No	No
23	22.03	75	90	60	59	194	123	59	74	13.3	7.09	0.34	2.43			No	No
33	23.35	82	105	60	100	173	94	59	74	13.3	2.66	0.91	2.43	20	0.07	No	No
25	22.35	88	110	70	58	111	61	38	76	12.95	6.283	0.39	2.43			No	No
30	27.96	98.5	110	80	58	155	102	41	78	12.6	8.1	0.3	2.43	26	0.1	No	No
58	32.88	104	110	70	162	200	126	42	103	9.53	5.609	0.43	2.42	15	0.22	Yes	No
22	20.28	74	100	60	132	236	118	92	99	9.9	8.77	0.28	2.42			No	No
60	27.83	97	160	90	248	221	132	40	92	10.6	4.4	0.55	2.41	23		Yes	No
60	29.59	98	110	70	95	166	104	43	74	13.17	18.034	0.13	2.41	28		No	No
51	27.49	93	130	90					90	10.78	4.982	0.48	2.4				No
38	29.17	95	120	80	52	140	87	43	82	11.7	3.62	0.65	2.37			No	No
18	25.29	80	140	80	123	205	127	53	82	11.7	3.37	0.7	2.37			No	No
44	28.83	97.1	120	82	130	211	136	49	76	12.6	4.24	0.56	2.36	16	0.09	No	No
31	35.06	110	120	80	83	231	166	48	79	12.11	3.77	0.63	2.36			No	No
25	19.62	86	90	60	165	221	126	62	81	11.8	5.78	0.41	2.36			No	No
22	21.23	63	120	80	54	133	83	39	75	12.7	10.58	0.22	2.35	6	0.13	No	No
31	36.73	110	104	72	59	169	98	59	72	13.2	2.54	0.92	2.35	13	2.48	No	No
18	20.37	70	110	80	121	120	44	52	80	11.86	2.7	0.87	2.34			No	No
55	28.05	100	110	75	38	228	135	85	75	12.6	11.06	0.21	2.33	20	0.31	No	No
24	20.85	61	120	70	91	274	148	108	75	12.6	11.02	0.21	2.33			No	No
49	30.02	100	140	80	126	230	157	48	89	10.61	2.664	0.88	2.33	9		Yes	No
56	30.55	99	110	70		269		75	82	11.5	8.64	0.27	2.33	19	0.78	No	No
32	24.71	74	128	75	99	163	94	49	90	10.44	4.9	0.47	2.32		0.76	No	No
51	28.8	92	130	70					110	8.5	3.74	0.62	2.31			No	No
41	26.92	100.3	144	92	74	164	107	42	90	10.3	3.43	0.67	2.29	23	0.03	Yes	No
47	32.46	110	115	80	132	244	166	51	82	11.26	3.845	0.59	2.28	22	0.22	No	No
52	30.05	97	137	92	117	155	91	41	107	8.6	4.41	0.52	2.27	30		Yes	No
45	25.2	88	120	80	246	178	79	50	84	10.9	4.5	0.5	2.26	123	0.28	No	No
26	19.23	74	90	60	106	172	99	52	84	10.9	3.47	0.65	2.26			No	No
32	18.68	66	120	70	89	153	90	46	88	10.39	6.6	0.34	2.26		0.53	No	No
28	22.03	75	140	90	191	191	125	28	85	10.69	11.3	0.2	2.24		0.41	No	No
27	36.02	101	110	70					86	10.5	5.47	0.41	2.23				No
58	24.16	92	140	100	145	241	174	38	106	8.51	3.851	0.58	2.23	18		Yes	No
22	25.95	89	100	70	76	116	57	44	77	11.7	3.02	0.74	2.22			No	No
49	28.8	92	120	80	68	201	143	44	89	10.1	4.49	0.49	2.22	175	1.72	No	No
39	29.25	96	110	70	60	154	93	49	84	10.7	3.33	0.67	2.22	14	0.21	No	No
30	31.01	89	120	70	63	176	121	43	86	10.45	7.763	0.29	2.22		3.59	Yes	No
37	28.77	99.5	120	90	118	180	115	41	91	9.87	2.86	0.78	2.22	90		Yes	No
39	27.43	92	112	73	189	195	114	43	86	10.4	13.41	0.16	2.21	38		No	No
23	37.72	113	120	80	104	221	125	75	95	9.4	4.34	0.51	2.2			No	No
23	25.46	88.5	150	75	103	276	156	99	75	11.9	3.12	0.71	2.2			No	No
23	23.83	76	120	70	71	158	84	60	78	11.37	4.316	0.51	2.19	9	0.14	No	No
27	21.63	73	120	80	77	137	80	42	94	9.43	5.168	0.42	2.19	18	0.23	No	No
52	27.55	96	120	110	199	270	180	50	86	10.3	5.27	0.42	2.19	44	0.18	No	No
22	23.64	85	90	60	90	154	112	24	75	11.8	3.8	0.58	2.19	11	0.13	No	No
29	32.28	89	130	80	110	293	191	80	83	10.6	2.73	0.8	2.17			No	No
59	41.73	116.5	140	90	73	185	127	43	75	11.7	3.22	0.67	2.17	15	0.6	Yes	No
23	25.23	86	120	80	186	178	87	54	79	11.1	3.5	0.62	2.17	8	0.92	No	No
37	29.39	98	120	80					98	8.93	16.876	0.13	2.16			No	No
21	25.6	86	110	70	117	204	105	76	78	11.2	5.84	0.37	2.16			No	No
18	26.67	93	112	60	60	135	58	65	75	11.6	6.75	0.32	2.15			No	No
61	27.97	91	146	92	94	182	113	50	106	8.2	8.8	0.24	2.15	20		Yes	No
20	21.39	75	110	60	114	239	139	71	73	11.9	5.58	0.38	2.14	13	0.45	No	No
28	25.84	80	100	70	128	195	128	27	101	8.52	9.27	0.23	2.12		0.57	Yes	No
50	45.79	141.3	130	70	124	262	174	63	81	10.6	3.26	0.65	2.12	17	0.65	No	No
20	21.83	82	120	80	51	162	86	66	81	10.6	2.53	0.84	2.12			No	No
18	23.56	73	120	80	53	143	87	45	83	10.3	3.77	0.56	2.11			No	No
20	23.85	76	120	80	81	126	61	49	70	12.2	4.67	0.45	2.11			No	No
54	34.05	106.5	130	90					79	10.8	5.11	0.41	2.11	16			No
37	30.89	96	120	80	57	127	71	45	75	11.35	8.04	0.26	2.1	21	0.27	No	No
57	34.54	112	130	80	108	174	116	36	93	9.1	2.52	0.83	2.09	15	0.16	Yes	No
41	39.99	123	130	90	98	247	172	55	82	10.3	3.05	0.68	2.09	16	0.57	No	No
47	32.46	101	140	80	125	184	115	44	83	10.13	11.392	0.18	2.08	13		Yes	No
18	20.51	80	110	70	54	118	61	46	78	10.77	2.751	0.75	2.07	8	0.16	No	No
35	38.67	102	120	80	73	238	145	78	73	11.5	3.79	0.55	2.07	15	0.52	No	No
29	25.41	91	100	80	57	157	98	48	81	10.3	6.79	0.3	2.06			No	No
24	28.72	86	110	80	69	153	88	51	90	9.21	3.789	0.54	2.05	11	0.09	No	No
51	23.4	84			89	203	119	66	105	7.9	4.98	0.41	2.05	9		No	No
42	34.05	96	100	70	70	186	123	46	86	9.6	5.63	0.36	2.04	22	0.49	No	No
28	29.13	100.6	150	100	86	136	81	38	85	9.71	3.355	0.61	2.04	14	0.54	Yes	No
22	21.01	71	90	60	118	204	120	60	75	10.87	4.81	0.42	2.01			No	No
56	25.12	87	110	70	177	180	101	44	84	9.7	3.28	0.61	2.01	28	0.12	No	No
28	27.66	89.5	110	80	90	179	100	61	89	9.1	4.264	0.47	2.01	57	0.12	No	No
18	26.5	85.5	100	67	220	213	123	46	103	7.89	4.301	0.47	2.01			No	No
28	26.46	96	120	70	64	114	49	52	76	10.68	2.83	0.71	2	13	0.19	No	No
37	31.7	98	130	90	84	191	132	42	75	10.8	3.4	0.59	2	14	0.12	Yes	No
47	32.47	93	150	90	116	210	131	56	92	8.8	6.96	0.29	2			No	No
51	30.7	99.7	100	72	118	223	141	58	71	11.4	2.55	0.78	2	13	0.68	No	No
19	30.19	102	120	80	109	228	110	96	77	10.5	5.34	0.37	2			No	No
59	27.16	89	110	70	143	322	250	53	94	8.59	4.09	0.49	1.99			No	No
18	21.76	70	93	65	51	185	110	65	78	10.3	2.71	0.73	1.98	13		No	No
31	27.6	78	110	70	151	169	95	44	73	11	2.67	0.74	1.98			No	No
40	26.58	96	100	70	195	187	112	36	75	10.7	4.14	0.48	1.98	10	0.06	Yes	No
50	29.89	109	120	90	94	194	126	49	81	9.9	2.43	0.81	1.98	14		Yes	No
49	31.74	94.5	110	70	61	170	96	62	87	9.2	2.49	0.79	1.98	24		No	No
34	27.28	97.6	100	70	100	105	45	46	89	8.97	4.41	0.45	1.97	13		No	No
19	26.35	76	130	70	50	154	83	61	76	10.5	9.52	0.21	1.97			No	No
28	25.15	85	110	70	145	215	121	65	76	10.5	4.66	0.42	1.97	13		No	No
36	26.56	87	122	84	75	187	112	60	79	10.1	3.2	0.62	1.97	17	0.8	No	No
23	28.3	82	130	80	111	214	136	56	73	10.9	6.84	0.29	1.96			No	No
38	31.02	106.3	122	80	92	192	120	54	77	10.3	2.51	0.78	1.96	16	0.14	No	No
32	19.1	60	117	77	69	139	74	51	80	9.9	6.21	0.31	1.96	19		No	No
55	24.34	58	138	80	152	227	130	67	85	9.3	3.4	0.57	1.95	72		No	No
38	25.08	80.5	110	70	104	152	92	39	90	8.76	3.42	0.57	1.95	15	0.06	No	No
23	25.2	80	110	60	103	226	145	60	90	8.7	7.79	0.25	1.93			No	No
19	26.91	96	95	60	81	131	67	48	76	10.3	4.6	0.42	1.93			No	No
18	19.77	63	120	80	43	144	85	50	93	8.4	2.83	0.68	1.93			No	No
18	20.4	70	107	70	125	158	86	47	100	7.78	3.8	0.51	1.92			No	No
54	26.16	99	140	100	120	208	142	42	81	9.6	3.39	0.57	1.92	11	0.85	Yes	No
23	23.33	82	120	80	158	120	42	46	98	7.91	3.33	0.57	1.91			Yes	No
20	25.58	98	90	60	112	183	90	71	89	8.7	2.97	0.64	1.91			No	No
52	22.25	88.6	142	90	131	271	192	53	79	9.8	3.82	0.5	1.91	11	0.07	Yes	No
29	34.43	97	120	80	140	203	121	54	86	8.95	8.105	0.23	1.9		0.22	No	No
18	18.66	76	110	60	147	180	105	46	74	10.4	9.39	0.2	1.9			No	No
47	36.93	111.2	162	87	75	194	122	57	92	8.35	3.22	0.59	1.9			No	No
41	27.4	86	130	90	61	190	122	56	80	9.6	3.47	0.55	1.9	27	0.08	No	No
54	29.92	108	120	80	106	241	139	42	76	10.08	15.228	0.12	1.89	25		No	No
22	26.22	79	90	50	119	204	132	48	79	9.62	5.546	0.34	1.88			No	No
54	29.13	94	110	80	121	221	142	55	92	8.25	2.983	0.63	1.87	16	0.86	No	No
29	26.88	83	110	80	76	215	121	79	79	9.6	5.06	0.37	1.87	8	0.65	No	No
46	21.83								101	7.5	4.88	0.38	1.87				No
35	25.97	77.5	120	90	76	163	98	50	87	8.7	7.1	0.26	1.87			No	No
25	24	89.8	110	80	128	152	72	54	94	8.04	3.844	0.49	1.87			No	No
31	46.65	120	132	70	63	172	118	41	83	9.1	3.23	0.58	1.86	76	0.82	No	No
49	30.41	110	130	80	233	206	118	41	88	8.55	3.948	0.47	1.86	22	0.66	Yes	No
21	21.77	78	110	82	42	142	85	49	80	9.4	4.16	0.45	1.86	21	0.02	No	No
32	29.48	84	120	80	119	201	132	46	86	8.73	8.2	0.23	1.85		2.12	No	No
53	34.23	106	120	80	150	212	142	40	92	8.14	4.078	0.45	1.85	14		Yes	No
28	25.21	69	120	70	61	137	78	47	77	9.7	5.02	0.37	1.84	16		No	No
58	34.6	106	120	80	67	182	110	59	102	7.32	3.962	0.47	1.84	12	0.26	No	No
29	24.41	84.3	120	80	43	164	84	71	96	7.8	4.48	0.41	1.84	14	0.09	No	No
52	26.31	83	130	90	105	208	139	48	111	6.71	5.843	0.31	1.84	24	0.21	Yes	No
21	25.2	83	102	64	83	156	79	60	94	7.9	13.76	0.13	1.83		0.03	No	No
18	30.48	88	110	80	74	182	122	45	82	9.02	6.6	0.28	1.83		1.88	No	No
55	28.24	102	120	80	100	99	47	45	87	8.5	5.48	0.33	1.83	21	1.7	No	No
29	24.3	91.2	100	60	81	196	117	63	77	9.6	3.63	0.5	1.83	10		No	No
20	20.72	71	100	56	109	139	72	45	119	6.21	3.7	0.49	1.82			No	No
24	29.59	72	120	70	40	144	91	50	78	9.45	10.9	0.17	1.82		0.38	No	No
21	19.14	81	120	80	71	155	95	46	80	9.2	5.95	0.31	1.82			No	No
43	25.95	95	110	60					80	9.15	4.646	0.39	1.81				No
19	22.95	78	100	60	87	141	84	40	69	10.6	4.07	0.44	1.81			No	No
33	22.19	67	120	80	220	234	104	86	72	10.1	10.58	0.17	1.8			No	No
18	21.74	72.5	123	83	123	181	94	62	79	9.2	4.73	0.38	1.79			No	No
24	36.52	110	110	70	120	213	149	40	86	8.44	3.052	0.59	1.79		0.19	No	No
18	23.83	67	100	60	99	163	94	49	90	8.05	9.554	0.19	1.79		1.21	No	No
21	20.64	73	100	70	99	197	110	67	83	8.7	4.38	0.41	1.78			No	No
45	33.56	103	125	70	65	169	118	38	80	9	10.67	0.17	1.78	15	0.17	No	No
48	32.04	99	140	100	200	234	152	42	72	10	8.2	0.22	1.78	60	2.39	Yes	No
64	33.75	106	130	80	177	127	56	36	92	7.8	5.45	0.33	1.77	29		Yes	No
28	24.39	78	110	60	83	158	101	41	88	8.14	2.705	0.65	1.77		0.87	No	No
41	29.9	91.2	140	85	146	199	124	46	83	8.6	5.02	0.35	1.76	16	0.1	Yes	No
28	22.1	70	110	70	126	221	114	82	80	8.9	8.09	0.22	1.76			No	No
18	18.98	58	130	70	33	127	81	39	69	10.3	5.46	0.32	1.75			No	No
23	27.48	87	100	70	89	218	118	82	78	9.1	8.54	0.21	1.75	19	0.16	No	No
30	23.6	76	130	90	128	250	107	117	80	8.8	13.76	0.13	1.74			No	No
20	22.29	82	110	60	114	164	94	47	70	10	6.57	0.26	1.73			No	No
33	33.24	105	110	70	70	144	80	50	81	8.6	3.86	0.45	1.72			No	No
57	31.66	109	130	90	214	207	127	37	94	7.4	6.55	0.26	1.72	13	0.53	Yes	No
35	22.27	84	120	80	45	125	66	50	73	9.52	3.446	0.5	1.72	17		No	No
24	22.89	72.5	100	60	118	170	98	49	92	7.53	7.2	0.24	1.71		3.6	No	No
22	21.77	80	110	72	99	135	64	51	76	9.07	6.64	0.26	1.7			No	No
38	22.56	77	120	80	197	206	133	34	71	9.7	3.51	0.48	1.7	25	0.77	No	No
42	26.72	92	110	70	84	200	113	70	75	9.14	5.61	0.3	1.69	12	0.12	No	No
30	26.16	83	100	70	110	185	114	49	86	7.96	8.2	0.21	1.69		1.96	No	No
30	26.16	83	100	70	110	185	114	49	86	7.96	4.212	0.4	1.69		1.96	No	No
20	22.85	75	125	80	120	164	88	52	76	9	4.61	0.37	1.69			No	No
33	33.19	107.2	120	80	85	228	149	62	72	9.48	5.44	0.31	1.69	24	0.14	No	No
48	24.13	86	100	70	101	200	124	56	74	9.2	2.85	0.59	1.68	24		No	No
34	25.89	74	120	80	53	210	154	45	78	8.7	3.8	0.44	1.68			No	No
27	28.29	91	123	80	198	161	69	52	82	8.26	6.04	0.28	1.67			No	No
20	24.22	85	110	70	190	203	119	46	83	8.16	2.82	0.59	1.67	8		Yes	No
33	24.18	75	110	80	43	173	84	80	91	7.42	4	0.42	1.67	5		No	No
57	29.7	96	162	68	173	210	128	47	95	7.1	6.36	0.26	1.67			Yes	No
19	28.44	80	120	80	39	117	63	46	82	8.2	3.46	0.48	1.66			No	No
47	26.58	85.6	112	72	56	126	69	46	85	7.9	18.93	0.09	1.66	15	0.15	No	No
21	25.89	80	110	60	90	241	183	40	76	8.78	6.031	0.27	1.65	21		No	No
56	25.68	87	135	95	64	214	140	61	81	8.2	7.54	0.22	1.64	14		No	No
25	24.25	85	117	70	191	434	342	54	79	8.4	5.05	0.32	1.64			No	No
34	27.79	99	115	75	285	244	145	42	98	6.76	2.871	0.57	1.64			Yes	No
29	28.04	78	100	60	65	161	92	56	77	8.6	2.9	0.56	1.64		0.26	No	No
31	25.96	90	110	80	99	109	49	40	68	9.65	3.686	0.44	1.63	19	0.23	No	No
43	20.23	80.6	120	80	104	170	96	53	89	7.4	2.47	0.66	1.63	23		No	No
27	25.06	73	100	80	50	137	73	54	76	8.66	11.891	0.14	1.63		0.64	No	No
35	27.61	95	110	70	144	186	115	42	72	9.14	4.2	0.39	1.62	14	0.32	No	No
18	24.03	74.5	110	70	76	155	96	44	88	7.47	6.259	0.26	1.62		0.39	No	No
18	24.03	74.5	110	70	76	155	96	44	88	7.47	4.1	0.4	1.62		0.39	No	No
48	30.7	100	120	70	98	182	124	38	72	9.13	3.037	0.53	1.62	10	0.21	No	No
55	29.56	95	167	102	74	220	150	56	98	6.7	3.08	0.53	1.62	19		No	No
30	26.9	92	124	83	91	214	147	49	83	7.9	8.78	0.18	1.62	26		No	No
54	28.43	89	110	60	147	247	168	50	83	7.9	3.49	0.46	1.62	14	0.12	No	No
20	20.22	69	100	60	146	157	66	62	69	9.5	9.92	0.16	1.62			No	No
50	24.27	82	100	60	59	152	82	58	71	9.2	4.17	0.39	1.61	10	0.05	No	No
31	27.82	93	110	75	62	151	70	69	73	8.9	4.69	0.34	1.6			No	No
35	22.95	86	140	90	99	174	101	53	89	7.3	4.58	0.35	1.6			Yes	No
32	25.88	88	110	80	144	186	115	42	71	9.14	2.54	0.63	1.6	14	0.32	No	No
21	24.53	92	120	80	74	161	86	60	72	9	5.32	0.3	1.6			No	No
21	23.01	63	120	70	59	113	61	40	84	7.7	3.3	0.48	1.6			No	No
51	21.85	81	215	119	278	239	142	42	98	6.6	2.9	0.55	1.6	28		Yes	No
25	27.83	97	110	80	98	112	45	54	67	9.63	3.17	0.5	1.59	11	0.07	No	No
23	21.56	71.5	120	92	43	135	78	48	75	8.6	2.93	0.54	1.59		0.02	No	No
45	42.32	130	110	70	80	199	102	29	94	6.85	3.714	0.43	1.59	24		No	No
24	18.61	65	100	70	36	158	63	88	91	7.05	9.432	0.17	1.58		1.49	No	No
32	33.41	94	90	60	71	139	94	31	83	7.72	6.2	0.26	1.58		7.13	No	No
53	25.23	89			72	189	140	35	81	7.9	11.58	0.14	1.58	12	0.22	No	No
31	23.81	89.5	100	65	78	176	109	51	84	7.6	3.75	0.42	1.58			No	No
57	22.22	85.5	100	80	128	185	113	46	84	7.6	3.25	0.49	1.58	21		No	No
57	21.92	74.1	122	100	68	167	102	51	85	7.5	9.97	0.16	1.57		3	No	No
48	38.09	115	130	80	138	240	164	48	87	7.3	2.67	0.59	1.57	17	0.47	Yes	No
24	25.2	88	120	80	61	160	103	45	87	7.3	2.53	0.62	1.57			No	No
36	27.77	91	125	85	76	185	116	54	78	8.1	9.87	0.16	1.56			No	No
20	19.96	81	105	70	58	167	94	61	76	8.3	6.02	0.26	1.56			No	No
20	21.07	66	110	70	134	199	123	49	70	9	4.64	0.34	1.56			No	No
60	25.65	96	125	90	146	230	150	51	101	6.22	3.672	0.42	1.55	15	0.2	Yes	No
59	27.43	90	120	90	195	232	150	43	98	6.4	2.89	0.54	1.55	18		Yes	No
38	22.01	87	112	80	64	165	104	48	71	8.8	3.02	0.51	1.54	25	0.09	No	No
27	19.59	67	100	70	54	160	100	49	79	7.9	9.432	0.16	1.54		4.68	No	No
21	19.31	70	122	80	38	155	72	75	78	8	2.58	0.6	1.54	24	0.06	No	No
24	23.01	80	110	70	115	189	98	68	77	8.1	5.13	0.3	1.54			No	No
47	33.67	92.5	110	70	62	248	179	57	77	8.1	5.08	0.3	1.54	25	0.36	No	No
27	20.96	73.5	120	80	118	214	125	65	76	8.2	9.13	0.17	1.54	16	0.16	No	No
25	23.75	78	102	75	31	110			76	8.2	8.43	0.18	1.54			No	No
47	22.07	78	120	70	88	199	128	53	77	8.07	5.255	0.29	1.53	14		No	No
35	25.48	82	110	70	74	183	119	49	85	7.31	11.1	0.14	1.53		1.18	No	No
33	30.41	103	130	90	79	162	92	54	72	8.6	7.36	0.21	1.53	12	0.11	No	No
21	22.82	81	110	60	76	175	100	60	79	7.8	6.71	0.23	1.52	11		No	No
52	27.57	87	120	80	373	227	102	50	77	8	2.6	0.58	1.52	24	0.22	No	No
49	24.61	80.5	118	84	102	245	157	68	83	7.4	4.38	0.35	1.52	12	0.21	No	No
35	27.85	92.5	120	90	124	172	115	32	84	7.3	5.5	0.28	1.51	30	0.31	No	No
28	19.15	60	110	70	97	188	129	40	84	7.25	17	0.09	1.5		0.48	No	No
32	24.65	83	110	70	99	147	91	36	84	7.25	4.09	0.37	1.5	19	0.11	No	No
28	25.89	84	100	70	57	191	105	75	95	6.41	7.5	0.2	1.5		0.25	No	No
28	25.89	84	100	70	57	191	105	75	95	6.41	3	0.5	1.5		0.25	No	No
22	20.81	70	100	60	62	169	94	63	92	6.6	3.77	0.4	1.5			No	No
19	32.11	96	120	70	68	137	64	59	89	6.8	8.8	0.17	1.49			No	No
25	39.72	103	120	85	72	175	119	42	78	7.68	3.05	0.48	1.48	20		Yes	No
21	19.14	75	110	70	46	155	90	56	82	7.3	2.84	0.52	1.48			No	No
48	27.19	93	110	80	114				92	6.5	2.83	0.52	1.48		0.39	No	No
39	25.07	93	119	77	105	152	96	35	83	7.2	3.31	0.45	1.48	24		No	No
23	22.07	74	110	70	50	134	66	58	73	8.18	21.414	0.07	1.47	9		No	No
50	27.51	89	178	110	160	238	145	61	78	7.6	3.57	0.41	1.46	14	0.64	Yes	No
28	34.48	103	140	80	107	180	109	50	76	7.8	2.75	0.53	1.46	25		No	No
40	25.74	96.1	100	70	95	176	110	47	80	7.4	6.94	0.21	1.46	22	0.82	No	No
39	38.99	111.5	110	70	60	178	118	48	80	7.4	4.376	0.33	1.46	10	0.42	No	No
30	22.68	79.3	130	80	52	156	74	72	81	7.3	6.45	0.23	1.46	28		No	No
34	25.5	84.5	110	70	56	127	80	36	88	6.72	3.01	0.48	1.46	18	0.02	No	No
24	23.91	86.5	120	85	65	168	93	62	74	7.9	10.4	0.14	1.44	17	0.02	No	No
27	28.52	109.5	90	60	83	153	101	35	80	7.3	3.3	0.44	1.44	15	0.17	No	No
50	35.66	117.5	125	80	364	315	182	60	72	8.1	2.78	0.52	1.44		0.36	No	No
24	25.3	75	110	70	81	137	80	41	78	7.47	3.505	0.41	1.44	13		No	No
37	26.82	93	100	60	91	190	108	64	84	6.9	4.8	0.3	1.43			No	No
22	23.93	83	105	65	64	127	68	46	69	8.4	3.59	0.4	1.43			No	No
22	21.95	83.3	120	80	56	184	127	46	76	7.6	5.5	0.26	1.43	11	0.02	No	No
34	23.48	82.6	122	90	47	157	97	51	76	7.6	4.62	0.31	1.43	35		No	No
54	29.21	100.5	124	86	136	199	127	45	76	7.6	3.26	0.44	1.43	33	0.37	Yes	No
22	26.12	75	120	70	100	182	116	46	75	7.7	6.53	0.22	1.43			No	No
19	27.63	101	105	70	60	148	100	36	74	7.8	5.96	0.24	1.43			No	No
21	23.73	78	100	60	57	203	139	53	80	7.2	4.93	0.29	1.42			No	No
18	21.5	80	100	60	99	176	114	43	72	8	3.78	0.38	1.42			No	No
35	29.48	103	120	80	110	163	92	49	81	7.1	3.06	0.46	1.42	14	0.11	No	No
21	24.67	68	100	60	61	121	63	46	69	8.3	5.02	0.28	1.41			No	No
57	23.83	90.5	104	64	179	223	146	41	110	5.2	4.65	0.3	1.41	17		Yes	No
25	23.95	76	110	70	109	223	159	42	84	6.8	13.7	0.1	1.41		0.85	No	No
20	21.29	83	115	75	79	154	60	78	84	6.8	2.9	0.49	1.41			No	No
31	19.44	74.5	110	70	68	183	122	47	77	7.4	3.59	0.39	1.41	24	0.03	No	No
36	28.44	92.9	110	70	78	145	80	49	93	6.1	4.617	0.3	1.41	14	0.18	No	No
46	34.27	105	122	68	153	184	125	29	78	7.3	2.77	0.51	1.41	34		Yes	No
33	22.6	80	90	70	78	134	52	52	73	7.8	2.71	0.52	1.41	41	0.05	No	No
19	23.23	84	110	70	204	219	135	43	90	6.29	3.639	0.38	1.4		0.22	Yes	No
23	19.69	80	110	70	108	154	86	46	69	8.2	4.43	0.32	1.4			No	No
22	20.34	67	120	70	37	162	102	53	84	6.72	3.63	0.38	1.39	9		No	No
40	20.45	67	110	80	63	209	103	93	94	6	5.44	0.26	1.39			No	No
29	31.77	110	110	70	90	186	113	55	97	5.8	7.4	0.19	1.39	51		No	No
53	26.43	93.5	110	80	98	190	127	43	76	7.4	4.17	0.33	1.39	81	0.29	No	No
45	22.68	79.1	110	70	146	188	109	50	78	7.2	3.38	0.41	1.39	34		No	No
23	20.27	60			29	188	119	63	102	5.5	4.48	0.31	1.39	6		No	No
25	21.14	78.8	120	90	129	163	96	41	71	7.9	5.85	0.24	1.38	12	0.17	No	No
31	26.64	92	110	65	144	200	102	42	99	5.63	5.388	0.26	1.38	10	0.15	No	No
21	22.32	76	120	80	69	128	71	43	74	7.5	6.37	0.22	1.37			No	No
26	42.06	120	115	80	74	196	120	61	90	6.15	2.54	0.54	1.37	20		No	No
34	30.22	102	100	90	72	145	86	45	85	6.5	5.83	0.23	1.36	15		No	No
62	38.01	112	135	69	203	191	114	36	94	5.83	3.53	0.38	1.35			Yes	No
25	19.5	70.5	111	70	112	205	89	94	75	7.3	8.64	0.16	1.35	18		No	No
47	24.06	84	99	66	77	206	147	44	96	5.7	3.88	0.35	1.35	22		No	No
20	19.32	74	100	60	85	170	87	66	84	6.5	7.65	0.18	1.35			No	No
28	22.38	86	100	60	48	154	88	57	83	6.56	10	0.13	1.34		1.15	No	No
51	32.59	103	160	100	102	242	168	54	81	6.7	5.31	0.25	1.34			No	No
64	31.01	96.1	135	61	377	224	108	41	88	6.16	2.84	0.47	1.34			Yes	No
36	26.35	91.5	100	70	44	159	108	42	76	7.13	5.969	0.22	1.34		1.94	No	No
46	27.12	52	125	80	180	181	106	39	106	5.1	4.16	0.32	1.33			No	No
37	31.29	99.5	80	60	43	141	78	55	79	6.84	8.32	0.16	1.33		2.91	No	No
37	31.29	99.5	80	60	43	141	78	55	79	6.84	4.208	0.32	1.33		2.91	No	No
53	21.11	78			43	170	118	44	90	6	3.7	0.36	1.33	14		No	No
43	31.25	97	127	83	82	216	134	66	81	6.6	7.23	0.18	1.32	43		No	No
37	27.62	98.3	120	70	83	163	95	51	69	7.74	9.91	0.13	1.32	14	0.87	No	No
27	22.42	74	120	80	63	186	127	47	94	5.67	6.457	0.2	1.32		0.38	No	No
25	25.07	88	100	60	88	175	96	61	75	7.1	11.4	0.12	1.31	10	0.99	No	No
50	47.35	148	110	82	121	233	166	43	76	7	2.502	0.53	1.31			Yes	No
37	22.72	68.8	110	70	125	208	120	63	78	6.8	4.13	0.32	1.31	21		No	No
53	20.64	73	110	70	130	220	144	50	100	5.3	5.016	0.26	1.31	23	0.25	No	No
18	20.08	76	100	70	52	163	113	40	84	6.3	3.73	0.35	1.31			No	No
41	27.74	99	130	80	83	188	108	63	75	7	4.13	0.31	1.3			No	No
40	21.33	82	100	50	49	198	122	66	76	6.9	5.41	0.24	1.29	12		No	No
46	26.78	87.5	110	60	164	266	184	49	77	6.8	2.54	0.51	1.29	22	0.26	No	No
59	31.87	104	130	80	44	179	87	83	78	6.7	8.12	0.16	1.29	13		No	No
49	29.06	96	140	90	123	194	134	35	79	6.6	4.17	0.31	1.29	15		Yes	No
48	22.71	84.5	140	90	108	206	112	72	69	7.54	3.44	0.37	1.28	12	0.36	No	No
43	25.25	68	116	76	119	205	106	75	80	6.5	2.78	0.46	1.28			No	No
34	22.59	76	110	70	106	185	65	99	89	5.83	4.292	0.3	1.28		6.32	No	No
56	27.19	86	136	61	138	232	147	57	83	6.24	5.6	0.23	1.28			No	No
18	23.23	78	131	87	54	160	93	56	82	6.3	3.65	0.35	1.28	11		No	No
46	30.11	101.2	112	80	118	234	145	65	77	6.7	10.24	0.12	1.27	38	3.68	No	No
20	28.08	81	115	75	58	158	89	57	77	6.7	6.22	0.2	1.27	24		No	No
59	23.74	85.6	130	84	130	172	106	40	77	6.7	3.25	0.39	1.27	12	0.04	No	No
25	22.11	72			92	208	121	69	79	6.48	3.24	0.39	1.26	28		No	No
35	21.97	73	110	70	69	178	118	46	84	6.09	11.399	0.11	1.26		11.55	No	No
57	25.32	94	125	76	91	134	70	46	102	5.01	4.13	0.31	1.26			Yes	No
19	20.98	78	100	55	110	141	85	34	70	7.3	2.78	0.45	1.26			No	No
24	23.15	81	100	70	56	172	98	63	68	7.5	9.86	0.13	1.26		0.33	No	No
18	22.94	83	174	84	41	118	65	45	76	6.7	10.6	0.12	1.26			Yes	No
52	23.73	60	113	57	127	202	114	63	82	6.2	6.02	0.21	1.26	15		No	No
29	22.62	73.5	100	80	68	150	91	45	78	6.5	4.57	0.27	1.25	10	4.09	No	No
29	20.39	80	100	60	92	158	88	52	107	4.73	4.92	0.25	1.25	8		No	No
55	21.1	83.6	100	60	72	205	144	46	79	6.4	2.66	0.47	1.25			No	No
22	19.5	72	110	70	140	196	97	71	81	6.22	5.2	0.24	1.24			No	No
23	22.53	79.3	120	64	87	172	95	60	74	6.8	6.61	0.19	1.24	17	0.1	No	No
54	27.8	101	100	70	131	222	143	53	75	6.7	9.89	0.13	1.24	19	0.1	No	No
19	19.87	78	100	60	51	135	65	60	75	6.7	8.37	0.15	1.24			No	No
37	25.11	95	100	70	143	250	164	57	78	6.4	4.59	0.27	1.23	27		No	No
51	33.68	107.9	110	80	73	222	160	47	86	5.8	3.99	0.31	1.23	26		Yes	No
27	25.3	76	110	80	55	165	110	44	90	5.53	7.439	0.17	1.23		1.63	No	No
39	34.54	112	140	100	63	169	97	59	72	6.9	2.52	0.49	1.23	9		No	No
49	43.04	116.3	174	104	114	206	130	53	90	5.52	3.02	0.41	1.23			Yes	No
59	22.72	71	120	80	60	220	135	73	80	6.2	5.53	0.22	1.22	14	0.02	No	No
47	28.35	97	118	88	64	144	88	43	87	5.7	6.16	0.2	1.22	22	0.09	No	No
18	20.29	73.5	100	60	35	120	53	60	84	5.9	6.3	0.19	1.22			No	No
37	29.02	92	110	78	162	246	176	38	84	5.9	4.38	0.28	1.22	25	0.36	Yes	No
42	24.88	87	110	70	74	147	89	43	99	5	10.4	0.12	1.22			No	No
20	24.18	85	92	60	62	188	117	59	66	7.5	3.97	0.31	1.22			No	No
52	27.25	93	100	80	167	206	128	45	93	5.3	8.94	0.14	1.22	33	0.03	Yes	No
32	20.55	63	110	80	48	145	80	55	77	6.4	8.35	0.15	1.22	11	0.05	No	No
63	35.09	115.1	140	100	153	227	143	53	78	6.3	5.02	0.24	1.21	14		Yes	No
38	27.59	89	120	80	210	291	207	42	88	5.57	5.334	0.23	1.21	34	0.16	Yes	No
37	22.1	78	120	70	36	158	100	51	82	5.94	4.9	0.25	1.2		0.34	No	No
21	26.1	77	100	60	43	143	84	50	77	6.3	9.5	0.13	1.2			No	No
22	22.03	78	100	60	116	136	57	56	80	6	2.45	0.48	1.19			No	No
23	23.73	84	100	60	58	155	98	45	81	5.9	4.65	0.25	1.18			No	No
64	23.67	90	140	90	88	247	159	70	90	5.3	4.49	0.26	1.18	32		No	No
23	24.3	89.5	110	70	69	188	131	43	92	5.12	3.706	0.31	1.16			No	No
21	22.85	80.5	130	75	116	231	139	69	76	6.2	8.37	0.14	1.16	11		No	No
26	24.52	82	120	80	42	144	71	65	76	6.2	3.19	0.36	1.16	11	0.2	No	No
53	29.04	106.4	121	76	184	190	113	40	87	5.41	3.63	0.32	1.16			Yes	No
46	23.75	79	90	70	105	226	137	68	71	6.6	2.43	0.48	1.16	14	1.18	No	No
50	25.02	69	120	70	87	207	142	48	72	6.5	2.89	0.4	1.16	20		No	No
37	24.36	88.5	110	80	115	214	103	88	72	6.48	5.45	0.21	1.15	17	0.04	No	No
39	25.34	86	120	70	75	140	82	43	79	5.9	3.82	0.3	1.15	27		No	No
53	26.49	93	120	80	58	227	150	65	93	5	4.62	0.25	1.15			No	No
55	19.25	66	100	70	59	140	81	47	80	5.8	7.43	0.15	1.15	23	0.2	No	No
36	25.72	89.5	111	70	84	164	106	41	67	6.91	3.041	0.38	1.14	70	0.33	No	No
23	19.9	80	110	80	78	184	109	60	84	5.51	3.329	0.34	1.14		0.3	No	No
20	23.1	78	120	73	152	179	106	43	84	5.51	3.048	0.37	1.14			No	No
44	33.03	97	100	70	87	186	115	54	72	6.4	3.21	0.35	1.14	20	0.06	No	No
49	26.77	90	110	60	55	179	117	51	96	4.8	3.49	0.33	1.14	27		No	No
18	26.35	94	105	60	55	152	81	60	78	5.9	4.39	0.26	1.14			No	No
55	26.09	95	110	60	80	166	89	61	72	6.39	4.6	0.25	1.14	9	0.24	No	No
33	21.61	76	100	70	54	138	85	43	82	5.61	7.332	0.15	1.14		2.31	No	No
41	37.5	126	140	80	90	180	108	54	75	6.12	2.519	0.45	1.13	20		No	No
34	27.63	94	120	90	134	216	141	48	74	6.2	4.36	0.26	1.13	36	0.15	No	No
40	26.79	95	100	70	74	182	137	30	79	5.8	3.43	0.33	1.13	8		No	No
30	24.3	85	120	80	66	187	120	54	80	5.7	3.905	0.29	1.13	14	0.08	No	No
31	24.71	79	95	70	84	134	72	45	73	6.23	2.7	0.42	1.12	18	0.16	No	No
30	27.08	96	120	80	109	189	117	50	71	6.4	4.75	0.24	1.12	19		No	No
24	18.58	68	90	50	78	139	57	66	84	5.4	8.46	0.13	1.12	13	0.23	No	No
20	20.8	79.9	110	63	51	198	129	59	72	6.3	3.83	0.29	1.12	16	0.06	No	No
19	20.7	76.1	100	63	32	142	81	55	92	4.92	9.159	0.12	1.12			No	No
35	21.26	78	110	80	146	145	58	58	90	5.02	6.4	0.17	1.12		6.03	No	No
44	26.48	94	100	70	107	177	96	60	74	6.1	7.79	0.14	1.11	28	0.14	No	No
62	32.59	107.5			56	159	75	73	83	5.4	3.788	0.29	1.11	17	0.21	No	No
29	25.04	72	120	60	81	201	134	51	77	5.8	5.25	0.21	1.1	17		No	No
51	28.15	88.8	130	95	95	179	110	50	77	5.8	3.6	0.31	1.1	9	0.12	No	No
24	19.85	62	110	70	65	150	66	71	75	5.94	4.252	0.26	1.1		0.56	No	No
45	29.77	101	107	73	122	215	151	40	89	5	5.57	0.2	1.1	26		No	No
64	22.67	89.6	159	47	106	127	71	35	98	4.54	3.47	0.32	1.1			Yes	No
19	35.95	103	130	90	71	138	69	55	90	4.92	4.92	0.22	1.09	26	0.35	No	No
57	25.59	86	110	70	123	166	82	59	75	5.9	2.7	0.4	1.09	10	0.41	No	No
55	32.82	100	120	80	130	283	213	44	80	5.52	2.707	0.4	1.09	22	0.26	No	No
53	24.64	84.5	120	80	93	231	157	55	105	4.2	3.44	0.32	1.09	31		No	No
27	21.89	74	100	70	46	169	89	71	76	5.8	10.16	0.11	1.09	9	0.19	No	No
54	23.87	84.4	110	65	156	218	151	36	71	6.2	2.88	0.38	1.09	22		Yes	No
24	22.9	83	97	67	68	142	65	63	83	5.29	5.595	0.19	1.08			No	No
44	29.26	102	130	100	55	174	111	52	75	5.8	2.96	0.36	1.07	25	0.09	No	No
27	22.77	70	110	80	46	166	104	53	87	4.99	11.9	0.09	1.07		1.54	No	No
21	19.61	78	110	80	83	160	83	60	72	6	7.27	0.15	1.07	17		No	No
19	19.17	69	100	60	54	146	77	58	80	5.4	6.16	0.17	1.07			No	No
36	28.06	97.5	110	80	93	213	128	66	77	5.6	6.92	0.15	1.06	17	0.06	No	No
22	19.6	69	110	70	112	176	86	68	81	5.3	4.02	0.26	1.06			No	No
49	27.12	88	150	90	138	214	150	37	67	6.38	6.944	0.15	1.06	32		Yes	No
58	23.14	97	120	80	151	141	69	42	70	6.09	27.026	0.04	1.05	17		Yes	No
22	19.82	66.5	100	60	57	131	64	56	71	6	11	0.1	1.05	14	0.05	No	No
37	22.12	91.5	120	80	75	200	125	60	85	5	8.8	0.12	1.05	8		No	No
49	28.76	92	120	90	111	192	124	46	90	4.7	8.49	0.12	1.04		0.09	Yes	No
22	20.65	63	110	70	49	154	78	66	75	5.6	7.88	0.13	1.04			No	No
60	22.23	78	140	90	87	203	126	60	71	5.9	4.41	0.23	1.03	10	0.1	No	No
40	24.31	84.5	110	80	60	198	125	61	79	5.3	3.94	0.26	1.03	11	0.02	No	No
45	23.55	81	110	75	153	201	109	61	80	5.2	4.11	0.25	1.03			No	No
47	22.43	83	100	65	96	201	132	50	89	4.67	5.052	0.2	1.03	10		No	No
27	21.8	74.8	110	70	150	180	95	55	83	4.95	6.75	0.15	1.01	11	0.29	No	No
38	24.44	75	130	90	52	139	80	49	76	5.4	6.46	0.16	1.01			No	No
38	30.2	69	117	90	49	211	135	66	72	5.7	3.65	0.28	1.01	21		No	No
24	21.71	74	110	60	85	180	107	56	73	5.62	2.751	0.37	1.01	14	0.24	No	No
39	29.31	78	110	80	48	107	51	46	77	5.28	4.98	0.2	1	40		No	No
49	23.17	81.5	130	90	92	186	129	39	93	4.33	2.57	0.39	0.99	11	0.01	Yes	No
20	20.34	70	100	70	76	112	72	55	82	4.9	4.64	0.21	0.99			No	No
33	21.25	77.5	117	80	107	189	108	60	74	5.4	6.2	0.16	0.99	29		No	No
47	27.64	88	120	80	79	110	47	50	78	5.11	3.64	0.27	0.98	13	0.11	No	No
52	28.8	88	127	70	84	179	119	43	75	5.3	8.61	0.11	0.98	24		No	No
43	29.8	94	120	90	159	232	142	58	75	5.3	4.41	0.22	0.98	14	0.26	No	No
30	24.46	82.2	110	60	66	154	91	50	86	4.6	2.58	0.38	0.98	23		No	No
37	23.74	79.6	110	80	51	176	101	65	69	5.7	2.87	0.34	0.97	11	0.21	No	No
61	23.95	90	140	80	80	231	135	80	103	3.8	5.8	0.17	0.97	28		Yes	No
63	28.37	95.5	147	79	86	217	137	63	86	4.54	7.93	0.12	0.96			No	No
47	24.12	83	112	89	108	227	126	79	85	4.59	6.25	0.15	0.96	22	0.21	No	No
36	27.53	92	110	80	52	167	115	42	83	4.7	3.094	0.31	0.96	11	0.32	No	No
54	27.67	94	130	80	70	223	165	44	81	4.8	8.2	0.12	0.96	20		No	No
21	20.73	76	120	80	53	96	95	90	76	5.1	6.99	0.14	0.96	31		No	No
52	24.29	92	100	60	89	178	107	53	76	5.1	2.43	0.39	0.96	19		No	No
42	21.55	82.4	110	80	69	156	93	49	79	4.91	4.68	0.2	0.96	15	0.12	No	No
33	19.93	76.5	90	70	76	198	111	72	82	4.7	6.04	0.16	0.95	21		No	No
33	30.01	99	100	70	78	243	155	72	74	5.2	8.65	0.11	0.95	20	0.53	No	No
28	20.44	53	107	67	88	148	64	66	65	5.9	4.48	0.21	0.95	17		No	No
65	26.38	87.7	120	60	241	331	240	43	71	5.4	8.93	0.11	0.95	16	0.15	Yes	No
26	35.46	98	130	80	137	92	29	36	90	4.26	3.93	0.24	0.95		23.64	Yes	No
46	32.87	101	120	80	81	144	95	33	69	5.54	4.89	0.19	0.94	12	0.09	No	No
46	26.74	87.8	120	80	100	120	56	47	78	4.9	2.52	0.37	0.94	14	0.04	No	No
42	26.63	89	120	77	76	181	107	59	83	4.6	11.06	0.09	0.94	18		No	No
43	25.61	94	100	60	239	194	88	58	73	5.2	4.18	0.22	0.94	12		No	No
19	23.59	81	100	70	59	163	106	45	77	4.9	4	0.23	0.93			No	No
37	19.52	72	140	90	55	168	105	52	75	5	3.32	0.28	0.93	21	0.03	No	No
28	20.96	75	90	60	53	161	107	34	83	4.48	4.504	0.2	0.92	8	0.26	No	No
40	27.57	93	110	90	30	128	59	63	77	4.8	6.34	0.14	0.91	39	0.23	No	No
42	41.91	115	160	110	90	187	121	48	90	4.1	2.613	0.35	0.91	17		Yes	No
43	32.89	107.5	122	84	76	166	110	41	73	5	2.77	0.33	0.9	19	0.19	No	No
34	20.33	79	110	60	36	154	98	49	70	5.2	4.91	0.18	0.9	16	0.02	No	No
21	23.6	89.5	103	60	80	150	87	47	93	3.91	4.036	0.22	0.9			No	No
20	36.13	108	120	80	86	189	126	46	98	3.7	2.9	0.31	0.9			No	No
29	29.99	84	100	70	58	168	113	43	67	5.4	2.59	0.34	0.89	23		No	No
24	24.34	72	110	80	50	157	92	50	75	4.81	6.607	0.13	0.89		1.24	No	No
24	22.17	77.5	110	70	193	181	98	44	68	5.3	7.08	0.13	0.89	130		No	No
40	26.12	82.5	96	60	153	170	79	60	74	4.87	8.84	0.1	0.89	10	0.15	No	No
32	22.55	79	100	60		164	69	57	73	4.9	3.48	0.25	0.88	27		No	No
38	22.67	79	120	80	76	199	123	61	66	5.4	3.51	0.25	0.88			No	No
19	19.94	64	100	70	59	182	113	57	71	5	6.29	0.14	0.88			No	No
32	24.75	80	110	70	75	171	89	67	72	4.9	3.76	0.23	0.87	11	0.03	No	No
28	20.51	69.5	95	70	122	172	99	49	72	4.9	3.17	0.27	0.87			No	No
49	30.64	124	120	80	132	166	83	56	73	4.83	4.914	0.18	0.87	11		No	No
34	25.47	86							85	4.14	11.29	0.08	0.87		0.16	No	No
47	22.89	83	117	77	80	232	145	71	65	5.4	3.55	0.24	0.87	25		No	No
24	19.74	68	100	50	77	173	112	46	85	4.1	5.603	0.15	0.86	12	0.24	No	No
25	20.69	72	110	70	75	172	123	34	87	4	6.175	0.14	0.86		0.2	No	No
43	23.44	92.8	100	60	101	136	74	50	70	4.9	3.21	0.26	0.85	27		No	No
48	24.12	81	100	60	46	220	109	102	81	4.2	4.53	0.19	0.84			No	No
31	22.26	81	100	70	71	163	96	53	87	3.9	3.93	0.21	0.84	29	0.11	No	No
52	24.86	78	120	70	98	279	170	90	92	3.68	20.471	0.04	0.84	13		No	No
52	29.09	91	130	85	85	223	154	52	82	4.12	9.472	0.09	0.83	15	0.23	No	No
28	23.62	75	100	60	41	153	85	60	80	4.21	10.68	0.08	0.83			No	No
39	29.59	101	120	70	105	202	124	57	71	4.74	3.973	0.21	0.83	14	0.18	No	No
37	29.82	87	125	90	125	227	148	54	84	4	13.29	0.06	0.83			No	No
37	26.49	93.1	120	80	213	196	122	34	97	3.45	2.582	0.32	0.82	21	0.8	Yes	No
38	31.07	99	110	90	82	255	155	54	74	4.5	4.51	0.18	0.82	14	0.4	No	No
51	26.78	88.5	110	80	89	214	135	61	67	4.88	2.71	0.3	0.81	15	0.13	No	No
44	27.25	91	100	60	94	195	110	66	81	4.01	24.833	0.03	0.8	16		No	No
24	29.39	93.5	102	62	38	159	102	49	90	3.6	10.18	0.08	0.8			No	No
27	25.32	87	103	60	75	191	113	63	72	4.5	10.05	0.08	0.8	21		No	No
41	23.64	82	120	90	50	205	123	72	74	4.36	3.107	0.26	0.8	20	0.1	No	No
32	19.24	64	90	50	102	243	97	126	75	4.3	4.43	0.18	0.8	16	0.08	No	No
22	20.55	74	80	60	80	183	106	61	89	3.61	5.546	0.14	0.79		0.52	No	No
28	23.31	72	110	70	117	188	94	71	73	4.4	4.17	0.19	0.79	14		No	No
42	20.52	80.5	110	60	55	164	61	92	73	4.4	3.85	0.21	0.79	33	0.04	No	No
58	23.03	89.4	120	90	242	258	158	52	76	4.2	5.12	0.15	0.79	12	0.33	No	No
54	26.04	89	120	80	75	178	94	69	86	3.7	8.05	0.1	0.79			No	No
62	30.13	88.5	130	80	135	246	154	65	85	3.7	5.66	0.14	0.78			No	No
45	22.64	97.3	110	70	238	199	89	62	73	4.3	7.03	0.11	0.78	25		No	No
45	23.35	90	120	80	201	184	114	30	88	3.5	3.42	0.22	0.76	32		Yes	No
42	27.15	87	110	70	74	156	95	46	75	4.1	2.84	0.27	0.76	19		No	No
22	25	89	120	80	70	162	73	75	73	4.2	5.65	0.13	0.76			No	No
26	19.39	72	100	60	173	202	116	51	74	4.1	4.4	0.17	0.75			No	No
28	20.43	69	110	60	55	180	127	42	74	4.02	6.986	0.11	0.73	28	0.18	No	No
25	24.71	87	100	70	87	199	129	53	76	3.9	11	0.07	0.73	12		No	No
45	20.69	84.6	122	90	37	131	63	61	76	3.9	4.41	0.17	0.73	19	0.24	No	No
23	23.55	74.7	100	70	50	193	125	58	80	3.7	3.13	0.23	0.73	8	0.02	No	No
29	23.98	86.4	120	70	78	101	47	45	76	3.86	2.85	0.25	0.72	12	0.13	No	No
45	41.12								98	2.99	3.06	0.24	0.72				No
23	20	74.8	102	60	48	141	56	75	86	3.36	3.71	0.19	0.71			No	No
33	19.02	74	110	60	56	133	70	55	74	3.88	26.3	0.03	0.71	7		No	No
23	19.95	61	100	70	67	146	95	38	87	3.3	2.82	0.25	0.71			No	No
25	26.03	96	105	70	224	165	83	37	80	3.58	8.144	0.09	0.71	41		Yes	No
33	22.09	83	90	60	40	182	102	72	73	3.9	3.85	0.18	0.7	16		No	No
30	24.46	67	110	57	102	210	117	73	81	3.5	7.49	0.09	0.7	17		No	No
22	23.34	87	110	65	75	115	52	48	70	4	4.88	0.14	0.69			No	No
34	19.66	71.5	90	56	97	141	72	50	82	3.4	7.51	0.09	0.69	12		No	No
50	21.34	86	120	80	135	200	108	65	87	3.2	3.75	0.18	0.69	20		No	No
22	29.09	91	120	80	44	125	64	52	72	3.86	4.8	0.14	0.69	23	0.92	No	No
21	20.17	70	100	60	43	129	75	46	79	3.5	6.407	0.11	0.68		1.34	No	No
49	30.71	92.2	120	90	119	177	105	48	83	3.3	2.96	0.23	0.68	27		No	No
39	23.36	82	100	60	58	183	120	51	76	3.6	2.69	0.25	0.68	14	0.05	No	No
29	22.58	90	100	60	55	123	58	54	72	3.78	20.471	0.03	0.67	14		No	No
31	32.77	101	110	70	63	201	129	59	73	3.7	2.72	0.25	0.67	11	1.09	No	No
43	22.39	74	110	80	117	201	70	108	77	3.5	12.76	0.05	0.67			No	No
25	21.67	65	120	70	45	171	91	71	81	3.3	8.7	0.08	0.66			No	No
56	43.37	123.4	162	93	111	213	153	38	94	2.84	2.71	0.24	0.66			Yes	No
55	23.73	81	130	80	130	249	178	45	76	3.5	4.58	0.14	0.66	17		No	No
52	26.73	100	120	70	80	224	144	64	70	3.8	3.71	0.18	0.66	32		No	No
44	21.16	75.7	110	80	44	264	162	93	119	2.21	3.98	0.16	0.65	22	0.21	No	No
35	28.26	92.3	120	90	59	161	77	72	77	3.4	5.54	0.12	0.65	10		No	No
18	30.24	90	105	80					96	2.71	8.08	0.08	0.64			Yes	No
54	28.84	100.1	120	70	138	242	161	53	73	3.56	2.87	0.22	0.64	13		No	No
47	19.57	73	90	60	51	208	95	103	72	3.6	5.96	0.11	0.64	14	0.02	No	No
49	26.61	88.2	120	74	124	166	94	47	94	2.75	2.89	0.22	0.64			Yes	No
47	27.42	79	110	80	64	196	133	50	76	3.4	6.2	0.1	0.64	17		No	No
57	32.57	103.2	135	72	132	241	165	50	83	3.09	6.34	0.1	0.63			No	No
40	22.37	82	110	66	53	174	87	76	73	3.5	5.26	0.12	0.63	5	0.03	No	No
43	23.47	74	120	80	62	158	87	59	77	3.26	24.883	0.02	0.62	16		No	No
57	35.85	104.3	118	73	117	173	108	42	85	2.9	3.26	0.19	0.61			No	No
19	24.92	78	114	76	76	160	90	55	79	3.1	2.72	0.22	0.6	13		No	No
27	20.72	85	105	65	114	159	83	53	69	3.5	4.44	0.13	0.6	22		No	No
21	20.29	67	90	55	69	150	89	47	70	3.4	13.41	0.04	0.59	11	0.01	No	No
33	26.58	84			62	182	123	47	74	3.2	8.78	0.07	0.58	21	0.02	No	No
28	22.35	76	110	70	60	215	127	76	71	3.31	11.322	0.05	0.58	8		No	No
38	35.41	114	120	80	65	137	64	60	68	3.44	3.032	0.19	0.58	28	0.4	No	No
39	22.95	90.3	119	84	73	146	90	41	91	2.56	6.84	0.08	0.58			Yes	No
49	21.93	86	120	70	130	134	70	38	82	2.81	2.699	0.21	0.57	38	0.19	No	No
48	24.89	79	130	90	50	144	74	60	72	3.1	2.63	0.21	0.55			No	No
39	28.95	100	100	70	95	168	94	55	75	2.89	10.07	0.05	0.54	11		No	No
53	26.91	92.4	135	90	85	281	202	62	84	2.56	3.19	0.17	0.53			No	No
53	24.89	83	100	60	126	141	60	56	79	2.71	2.61	0.2	0.53	25	0.24	No	No
26	21.5	68	110	70	80	175	102	57	75	2.79	3.126	0.17	0.52		0.19	No	No
53	25.15	89	120	80	75	174	116	43	97	2.14	5.902	0.09	0.51	11		No	No
42	25.84	96	120	80	124	178	111	42	103	2	10.05	0.05	0.51	17	0.04	Yes	No
25	22.26	103	100	67	196	134	44	51	65	3.1	7.49	0.07	0.5			No	No
50	42.73	122.7	130	65	65	160	90	57	88	2.14	2.6	0.18	0.46			Yes	No
30	25.57	83	120	80	130	192	94	72	78	2.4	7.7	0.06	0.46	23		No	No
58	25.76	104	120	80	69	160	77	69	74	2.5	8.01	0.06	0.46			No	No
38	19.65	79	110	70	53	143	84	48	76	2.4	3.37	0.13	0.45	18	0.07	No	No
30	27.83	95	110	60	48	134	69	55	78	2.3	6.72	0.07	0.44	15		No	No
25	22.63	83.4	110	80	90	175	106	51	72	2.4	3.45	0.12	0.43	20		No	No
44	30.84	97	120	80	82	240	174	50	101	1.71	9.416	0.05	0.43	28		No	No
26	27.55	97	120	80	80	170	98	56	70	2.41	4.675	0.09	0.42	48	0.23	No	No
19	19.72	81.5	90	60	65	141	77	51	79	2.1	4.07	0.1	0.41			No	No
21	18.83	70	100	60	97	130	64	47	91	1.75	4.656	0.08	0.39	15		No	No
36	24.94	91	110	80	83	150	71	62	72	2.2	6.46	0.06	0.39	19	0.34	No	No
27	19.07	70	100	60	53	186	126	49	71	2.23	4.137	0.09	0.39	18	0.2	No	No
32	20.69	68	110	65	99	189	112	57	77	2.05	4.193	0.09	0.39	10	0.25	No	No
42	24.61	93	120	70	79	100	68	48	83	1.9	6.376	0.06	0.39	10		No	No
33	23.37	90	110	80	42	169	121	40	77	2.03	4.858	0.08	0.39	11		No	No
42	26.76	95	90	60	90	187	119	50	77	2	4.91	0.08	0.38	18	0.25	No	No
38	19.92	80	100	60	44	128	52	67	84	1.72	16.229	0.02	0.36	16		No	No
39	25.4	85	100	70	159	182	108	42	96	1.5	2.94	0.12	0.36	27	0.47	No	No
23	23.37	82	120	80	35	103	69	27	76	1.86	12.848	0.03	0.35	8		No	No
23	34.19	108	110	70	65	127	57	57	73	1.9	6.61	0.05	0.34	9		No	No
22	22.31	79	100	60	120	189	84	81	81	1.63	3.108	0.1	0.33	25		No	No
39	22.81	70	110	70					74	1.77	11.29	0.03	0.32			No	No
24	19.56	67	120	80	48	128	72	49	76	1.68	6.088	0.05	0.32	10	0.24	No	No
54	23.62	86.5	100	60	74	202	107	80	74	1.6	10.44	0.03	0.29	11	0.05	No	No
34	21.93	78	120	80	63	107	61	33	76	1.52	3.396	0.08	0.29	18		No	No
27	22.55	84	110	75	105	143	62	50	86	1.25	4.74	0.06	0.27	17	0.19	No	No
39	27.56	90	110	70	140	175	107	40	74	1.45	4.118	0.06	0.26	17		No	No
57	26.99	93	120	80	158	208	133	43	80	1.32	9.834	0.03	0.26	12		Yes	No
55	27.17	92	120	80	73	162	107	40	79	1	9.45	0.02	0.2			No	No
21	25.68	80	110	60	90	241	183	40	76	1	8.29	0.02	0.19	43		No	No
39	19.48	70	90	50	76	143	88	40	71	0.87	17.341	0.01	0.15			No	No
53	31.08	103	110	70	146	212	128	55	97	60.6	3.95	3.67	14.51	35	0.11	No	No
40	26.44	93	110	70	36	157	93	57	75	65.8	9.34	1.3	12.19	12	0.03	No	No
23	29.36	90.3	100	72	89	172	111	43	88	47.3	3.9	2.64	10.28			No	No
37	40.48	117	130	90	85	184	114	53	93	43.33	3.36	2.96	9.95	22		No	No
24	29.92	95	110	80	271	207	113	40	86	38.99	3.6	2.3	8.28		1.3	Yes	No
29	41.43	102	110	80	184	287	202	48	89	37.4	3.31	2.48	8.22	60		No	No
27	32.43	96	120	80	328	203	107	31	93	35.25	6.017	1.35	8.09		1.45	Yes	No
54	35.2	104	120	80	149	234	167	37	96	31.39	2.471	3.01	7.44	16	0.2	No	No
61	47.55	118.2	150	100	78	247	179	52	100	30.1	2.66	2.79	7.43	16	2.79	Yes	No
30	32	78	120	80	90	166	113	35	97	29.69	5.546	1.28	7.11		3.77	No	No
31	40.67	124	130	90	98	195	138	37	83	31.6	2.84	2.28	6.48		1.72	Yes	No
64	32.9	102.5	138	93	184	153	79	36	105	23.9	7.14	0.87	6.2	19		Yes	No
61	47.44	124	183	117	99	185	121	44	109	22.7	3.06	2	6.11	18		Yes	No
55	33.71	104	114	70	134	179	108	44	101	23.69	3.09	1.91	5.91			Yes	No
27	36.17	115.6	121	79	136	214	152	35	96	24.7	4.41	1.33	5.85	95	0.3	No	No
42	28.2	94.2	122	90	59	158	95	51	74	30.3	4.56	1.21	5.54	8	0.06	No	No
41	46.46	127	110	90	93	159	100	40	101	22.1	3.25	1.7	5.51	41		Yes	No
38	26.86	99.8	120	80					88	25.1	2.57	2.12	5.45			No	No
23	33.48	103	110	80	76	170	89	66	85	25.9	3	1.81	5.44	9	0.92	No	No
21	40.26	117	130	90	156	150	77	42	82	26.8	2.93	1.85	5.43	34	0.15	Yes	No
19	26.67	95	120	80	161	231	130	69	98	22	5.43	0.98	5.32			No	No
54	29.68	99	120	76	101	220	149	51	104	20.59	2.98	1.77	5.29			Yes	No
23	39.33	114	130	100	120	195	120	51	86	24.7	3.51	1.49	5.24			No	No
50	29.45	102.5	120	80	89	216	157	41	104	19.9	10.78	0.47	5.11	37	0.14	Yes	No
39	29.94	102.5	144	95	112	202	134	46	99	20.9	2.84	1.8	5.11	23		No	No
18	31.64	96	130	90	61	168	111	45	81	25.49	9	0.57	5.1		2.27	Yes	No
29	42.91	116	110	80	135	190	123	40	97	21.2	3.15	1.61	5.08		5.78	No	No
20	29.48	94	110	70	108	213	157	34	79	25.89	3.3	1.53	5.05		4.84	No	No
29	26.42	82	114	72	68	218	131	73	90	22.7	5.26	0.96	5.04	10	1.34	No	No
27	29.43	80	130	90	90	113	99	46	91	22.31	3.3	1.52	5.01		2.55	Yes	No
32	42.17	104	111	84	172	206	95	77	70	28.8	2.72	1.83	4.98	34		No	No
33	29.14	90	130	80	123	150	63	63	96	20.8	3.45	1.43	4.93			No	No
47	32.03	99	120	75	195	91	40	48	97	20.53	4.347	1.13	4.92	9	0.17	Yes	No
46	32.82	106.6	140	90	126	142	81	36	88	22.6	3.57	1.38	4.91	26		Yes	No
34	34.31	95	100	70	198	187	106	42	93	21.23	3.135	1.56	4.88		1.36	Yes	No
39	25.64	91	100	70	32	181	101	74	93	20.5	2.67	1.76	4.71	43	0.08	No	No
33	24.54	89	120	85	98	166	94	52	123	15.46	6.04	0.78	4.7	30		No	No
35	34.85	108	110	80	160	155	92	38	124	15.3	3.55	1.32	4.68	97		Yes	No
23	33.13	92	127	87	187	241	145	59	66	28.5	2.96	1.57	4.64	25		Yes	No
21	31.16	100	90	50	54	133	66	56	98	18.8	3.98	1.14	4.55			No	No
40	37.18	118	133	86	121	205	128	53	87	21.1	3.54	1.28	4.53	25		No	No
47	32.92	101.5	120	70	98	211	140	51	108	16.8	5.51	0.81	4.48	22	0.14	No	No
26	22.57	81	90	50	97	123	56	48	73	24.7	6.94	0.64	4.45			No	No
29	47.62	124	128	86	123	163	72	66	84	21.2	2.55	1.72	4.4	77	0.94	No	No
49	33.33	82	127	77	132	226	151	49	78	22.7	5.26	0.83	4.37	33		No	No
35	35.24	100	130	80	66	145	61	71	76	23.1	2.93	1.48	4.33	21	0.12	No	No
38	34.76	102	120	80	112	205	108	75	74	23.5	3.75	1.15	4.29			No	No
46	30.33	101	110	70	150	257	178	49	69	25.14	4.51	0.95	4.28	17	0.19	Yes	No
34	35.93	105			54	223	134	78	92	18.7	3.18	1.34	4.25		0.14	No	No
35	31.22	79	100	80	100	164	105	39	83	20.7	2.8	1.52	4.24	35		No	No
49	26.74	83	109	84	177	225	143	46	111	15.4	3.51	1.2	4.22	42		Yes	No
58	33.98	97	130	90	101	183	102	61	72	23.3	6.56	0.63	4.14	38	0.44	No	No
30	41.26	113	150	107	210	204	116	46	68	24.64	3.18	1.3	4.14	46	0.71	Yes	No
21	27.79	98	141	82	96	180	112	49	85	19.6	4.91	0.84	4.11	40		No	No
47	31.56	107.5	100	70	114	221	141	57	81	20.3	6.21	0.65	4.06	17	0.11	No	No
28	37.56	111	120	80	49	156	103	43	79	20.8	2.94	1.38	4.06			No	No
20	27.7	92	112	67	346	229	106	54	86	19.06	3.352	1.21	4.05			No	No
40	29.39	85	100	60	125	196	115	56	90	18.1	6.24	0.64	4.02			No	No
53	28.68	101	130	80	140	290	214	48	80	20.25	6.727	0.59	4			Yes	No
33	29.24	102	120	80	163	222	133	56	89	18.2	5	0.8	4			No	No
40	33.2	101	120	80	205	257	171	45	103	15.6	2.67	1.49	3.97	20	0.49	Yes	No
43	24.41	88.5	110	70	270	250	163	33	88	18.1	2.68	1.47	3.93	21	0.63	Yes	No
20	32.16	104.5	110	60	130	157	77	54	78	20.3	5.2	0.75	3.91	26	0.29	No	No
54	33.26	107.4	138	82	179	277	172	69	91	16.9	2.95	1.29	3.8	82	0.29	Yes	No
40	47.66	123.4	154	100	80	153	96	40	80	19.2	2.44	1.55	3.79	29	2.18	Yes	No
24	32.83	101	100	70	100	183	127	37	97	15.81	6.862	0.55	3.79		18.23	No	No
24	32.83	101	100	70	100	183	127	37	97	15.81	3.135	1.21	3.79		18.23	No	No
45	31.75	98.5	120	70	137	154	81	46	70	21.88	2.938	1.29	3.78	84	0.24	No	No
45	32.87	98	130	110	193	220	137	44	84	17.8	5.66	0.65	3.69	28	0.2	Yes	No
28	21.6	70	100	70	125	227	158	44	93	16	3.7	0.99	3.67			No	No
27	34.81	120	90	60					83	17.9	2.66	1.38	3.67			No	No
45	27.15	87.9	94	60	458	231	95	44	90	16.5	4.29	0.85	3.67	27	0.22	Yes	No
37	31.44	100	120	80					99	14.96	10.399	0.35	3.66				No
22	21.97	72	120	70	40	167	108	51	82	18.04	16.4	0.22	3.65		0.33	No	No
24	23.15	79	120	70	72	203	111	78	78	18.8	8.64	0.42	3.62	7	0.28	No	No
60	37	121	130	94	274	281	195	31	75	19.4	2.85	1.26	3.59	35	2.63	Yes	No
54	24.69	94.5	120	80	104	173	95	57	84	17.3	2.64	1.36	3.59	17	0.26	No	No
52	30.98	105	120	80	467	288	154	41	83	17.5	5.8	0.62	3.59	34	0.45	Yes	No
39	37.91	117	150	110	35	193	87	99	75	19.3	3.03	1.18	3.57	24	0.18	No	No
44	31.76	94	140	90	110	180	114	44	76	19	6.72	0.53	3.57			Yes	No
19	29.62	93	150	70	84	171	101	53	73	19.7	4.08	0.87	3.55			No	No
18	23.79	81.5	93	50	71	171	94	63	87	16.5	2.44	1.45	3.54	10		No	No
37	32.89	88	120	80	86	197	139	41	98	14.58	8.955	0.39	3.53		1.09	No	No
58	32	104	120	80	72	196	113	69	85	16.7	10.908	0.32	3.5	24		No	No
58	30.38	106	112	79	88	225	171	36	120	11.79	7.039	0.5	3.49	23		Yes	No
35	45.59	126	130	90	158	212	124	56	86	16.4	3.12	1.12	3.48	31		Yes	No
27	27.87	100.2	110	70	90	139	78	43	83	16.98	2.665	1.31	3.48	21	0.21	No	No
62	30.59	103.6	140	90	260	266	154	60	93	15	3.1	1.11	3.44	27	0.28	Yes	No
47	29.43	93	200	120	130	246	175	45	95	14.6	2.43	1.41	3.42			No	No
22	20.6	70	100	70	153	153	42	81	89	15.43	7.069	0.48	3.39		0.48	No	No
38	24.69	91.4	110	80	50	184	104	70	84	16.3	3.81	0.89	3.38	14	0.1	No	No
37	23.62	89.5	100	64	77	173	99	59	73	18.6	4.03	0.83	3.35	23	0.03	No	No
51	30.4	102	130	80	165	277	206	38	98	13.8	7.15	0.47	3.34	26	0.15	Yes	No
25	27.15	87	110	60	47	172	113	50	87	15.39	2.6	1.27	3.31		0.46	No	No
49	34.45	110	160	80	198	233	146	48	107	12.5	2.63	1.26	3.3	31		Yes	No
29	30.52	86	130	70	105	164	89	54	72	18.5	8.56	0.38	3.29			No	No
51	26.98	98.3	150	100	161	211	117	62	96	13.87	4.048	0.81	3.29	28	0.22	Yes	No
26	29.37	96	110	70	91	195	105	72	80	16.6	3.73	0.88	3.28			No	No
55	26.51	94	106	72	215	242	157	43	111	11.96	10.12	0.32	3.28	23		Yes	No
31	24								80	16.57	7.415	0.44	3.27				No
30	22.5	84	110	80	99	213	148	46	100	13.16	9.86	0.33	3.25		0.44	Yes	No
65	33.84	103	142	70	165	224	144	47	83	15.7	2.67	1.21	3.22	24		Yes	No
23	23.83	80	100	65					90	14.46	30.493	0.11	3.21			No	No
19	23.73	88	120	80	149	192	84	78	85	15.2	3.19	1	3.19			No	No
37	28.87	95.3	110	70	57	213	134	68	89	14.49	4.445	0.72	3.18	20	0.52	No	No
27	31.82	98	130	90	97	172	103	50	82	15.6	2.8	1.13	3.16			No	No
20	28.12	82	120	80	84	168	110	41	89	14.34	4.4	0.72	3.15		18.34	No	No
20	23.3	86	100	70	66	168	114	41	85	15	4.31	0.73	3.15			No	No
18	23.66	80.5	110	70	170	184	91	59	81	15.73	5.99	0.53	3.15			No	No
31	38.56	123	110	80	104	152	71	60	77	16.5	4	0.78	3.14	35	0.13	No	No
28	28.33	95.5	161	103	112	268	190	56	73	17.4	6.84	0.46	3.14	16		No	No
44	43.01	105	130	100	122	153	92	37	92	13.78	2.71	1.15	3.13	45		Yes	No
58	26.67	96	120	70					97	13	8.47	0.37	3.11	67			No
35	29.79	104	100	60	74	237	173	49	87	14.4	2.69	1.15	3.09			No	No
49	26.93	91	100	80	77	213	135	63	81	15.4	4.2	0.73	3.08	33		No	No
25	26	101	120	80	72	197	125	57	86	14.5	2.97	1.04	3.08			No	No
23	25.25	81	110	75	34	113	57	49	76	16.4	2.72	1.13	3.08	18	0.03	No	No
53	27.88	90	120	80	91	210	144	48	89	14	10.01	0.31	3.08	32	0.48	No	No
18	20.31	58	110	70	76	163	92	56	80	15.5	5.22	0.59	3.06			No	No
22	24.54	73	120	80	50	133	77	46	95	12.96	4	0.76	3.04		0.83	No	No
21	20.45	85	113	80	94	241	163	59	115	10.68	3.82	0.79	3.03			No	No
23	21.3	72	110	70	52	143	83	50	94	13.05	4.7	0.64	3.03		0.55	No	No
63	32.09		130	80	138	297	202	67	89	13.76	4.29	0.7	3.02	12	0.3		No
59	25.19	91.6	120	70	105	183	116	46	84	14.4	2.98	1	2.99	17		Yes	No
49	22.9	89.6	100	70	68	228	141	73	108	11.2	3.41	0.88	2.99			No	No
37	34.29	104	110	70	123	201	127	49	66	18.3	6.5	0.46	2.98	18		No	No
53	25.03	89.3	100	70					90	13.4	2.59	1.15	2.98			No	No
18	29.24	85	110	70	81	121	66	39	78	15.4	2.66	1.12	2.97			No	No
57	39.56	100			119	186	116	46	95	12.6	3.48	0.85	2.96	78		No	No
48	33.29	108	115	70	83	153	91	45	98	12.2	3.39	0.87	2.95	21		No	No
18	26.67	94	100	50	67	179	121	45	80	14.9	3.99	0.74	2.94			No	No
22	21.59	91	100	65	111	213	128	63	82	14.5	6.61	0.44	2.94			No	No
27	23.19	71.3	120	85	116	206	103	80	90	13.2	4.37	0.67	2.93	11	0.55	No	No
49	24.62	83.7	110	78	327	196	94	37	94	12.6	5.51	0.53	2.92	28	0.04	Yes	No
21	21.84	71	110	60	118	274	192	59	100	11.83	7.873	0.37	2.92		0.31	No	No
45	29.56	93	130	90	161	247	167	48	101	11.7	3.49	0.84	2.92	75		Yes	No
22	24.42	84.5	100	70	64	174	118	44	76	15.49	2.642	1.1	2.91		2.91	Yes	No
42	40.23	105	146	90	108	194	116	56	91	12.9	2.797	1.04	2.9	52		No	No
24	31.2	96	100	60	90	148	92	38	83	14.06	4.749	0.61	2.88		3.94	No	No
40	44.16	107.5	130	80	155	209	142	36	73	15.9	2.7	1.06	2.87	17	1.37	Yes	No
37	30.22	97	120	90	99	176	32	58	82	14.04	6.2	0.46	2.84		0.71	No	No
49	32.88	108	120	80	98	142	77	45	86	13.26	3.87	0.73	2.82	118		No	No
43	29.75	104.5	120	90	147	214	147	38	96	11.9	3.674	0.77	2.81	16	0.82	Yes	No
20	22.74	74	100	60	94	152	79	54	78	14.59	8.8	0.32	2.81			No	No
61	25.59	93.4	120	80	153	187	110	46	87	13.08	2.428	1.16	2.81	28	0.39	Yes	No
52	21.22	74	100	60	100	171	89	62	98	11.6	5.04	0.56	2.81	12		No	No
20	19.77	68	120	70	150	166	86	50	84	13.5	3.04	0.92	2.8			No	No
38	31.64	92	120	85	107	219	157	41	67	16.87	5.342	0.52	2.79	16		Yes	No
20	23.63	83	110	70	67	167	95	59	76	14.8	6.16	0.45	2.78	15		No	No
30	23.8	96	90	50	115	178	102	53	98	11.47	3.387	0.82	2.78	52	0.22	No	No
35	31.38	93	160	110					102	11	2.429	1.14	2.77	1	0.09	Yes	No
47	25.47	87.5	110	80	64	162	104	45	71	15.8	2.68	1.03	2.77	14	0.3	No	No
27	34.23	103	124	60	79	163	109	38	74	15.1	6.82	0.4	2.76	29	1.25	No	No
53	28.1	98.5	130	92	129	216	127	63	82	13.6	3.33	0.83	2.75	13	0.11	No	No
53	28.1	96	160	90	229	222	135	41	90	12.3	3.85	0.71	2.73	17		Yes	No
44	25.65	89	130	80	152	145	68	47	76	14.56	3.31	0.83	2.73	84		Yes	No
49	30.7	91	121	71	148	214	118	66	80	13.8	7.54	0.36	2.73	22		No	No
38	26.23	104	120	80	68	209	156	39	88	12.4	2.37	1.14	2.69			No	No
36	29.65	98	110	80	177	208	119	54	73	14.9	1.7	1.58	2.69	37	0.83	No	No
43	28.95	105	138	86	418	219	96	39	89	12.2	1.98	1.35	2.68	51		Yes	No
49	29.86	99	120	70					110	9.84	1.93	1.38	2.67			No	No
59	46.66	119	130	80	133	220	148	45	85	12.7	1.5	1.78	2.67			No	No
32	22.81	86	100	60	66	126	65	48	81	13.2	2.33	1.13	2.64			No	No
49	36	130	166	116	85	185	115	53	112	9.2	2.35	1.08	2.54			Yes	No
38	31.65	98	120	80	133	257	181	49	83	12.24	1.92	1.31	2.51	20	0.26	No	No
54	26.04	107.4	130	70	232	247	151	50	91	11.1	2.17	1.15	2.49	15		Yes	No
25	22.8	76	116	68	77	162	93	54	75	13.2	1.81	1.35	2.44	24		No	No
21	30.98	93	100	60	57	148	72	65	90	10.9	0.87	2.78	2.42	34		No	No
36	29.34	97.5			109	133	73	38	71	13.4	1.847	1.27	2.35		0.14	Yes	No
38	29.75	98.5	120	80	63	205	148	44	82	11.5	1.09	2.14	2.33			No	No
44	42.42	119	140	100	117	190	127	40	97	9.7	1.8	1.29	2.32	35		No	No
32	24.71	74	128	75	99	163	94	49	90	10.44	1.6	1.45	2.32		0.76	No	No
38	33.94	104	120	80	54	138	83	44	77	12.2	1.52	1.53	2.32	21	0.44	No	No
34	30.6	112.5	100	70	116	211	123	65	77	12.2	1.09	2.13	2.32	33	0.82	No	No
52	35.67	103	130	70	61	188	123	53	80	11.64	1.154	1.99	2.3		0.24	No	No
52	31.03	99	134	81	116	240	155	61	87	10.7	2.065	1.11	2.3	166		Yes	No
30	22.97	76	110	70	78	184	108	60	116	7.88	2.406	0.94	2.26	36		No	No
32	31.65	105.9	110	60	126	169	101	44	70	13	1.17	1.92	2.25	27		Yes	No
41	29.32	99.2	130	70	75	199	135	49	80	11.3	2	1.12	2.23	18		No	No
41	23.01	90	110	80	148	244	168	46	85	10.58	1.08	2.06	2.22	18	0.05	No	No
47	32.67	105	150	90	105	209	132	56	88	10.2	0.83	2.67	2.22	39	0.69	No	No
37	36.39	97	110	80	94	205	137	49	76	11.8	1.75	1.27	2.21	19	1.31	No	No
65	36.41	109	120	80	239	372	268	56	71	12.3	2.05	1.05	2.16	24	0.13	No	No
35	40.44	112.6	112	80	100	169	107	42	97	8.91	1.9	1.12	2.13	28	0.19	No	No
25	48.44	107	120	90	197	206	125	42	80	10.7	2.14	0.99	2.11	17		Yes	No
64	26.02	90.5	116	74	94	208	122	67	99	8.5	2.42	0.86	2.08	14		No	No
57	29.2	91	138	85	73	177	119	44	93	9	1.9	1.09	2.07	19		No	No
23	27.2	94.5	100	60	159	214	149	33	90	9.26	2.359	0.87	2.06			Yes	No
38	22.72	88	120	80	84	262	162	83	73	11.3	1.24	1.64	2.04	12		No	No
40	27.59	95.6	140	86	86	213	144	52	89	9.2	1.6	1.26	2.02	61	0.09	No	No
20	22.17	78	120	80	71	157	104	39	77	10.6	1.75	1.15	2.02	7		No	No
35	26.54	94	130	80	169	191	107	50	80	10.2	1.19	1.69	2.01	19		No	No
21	23.31	81	120	80	108	166	90	54	72	11.2	2	1	1.99			No	No
25	22.23	64	110	80	50	161	88	63	78	10.2	1.69	1.16	1.96			No	No
61	37.5	110	150	77	157	158	81	46	101	7.84	2.05	0.95	1.96			Yes	No
38	25.68	99	120	80	139	245	160	57	84	9.2	1.86	1.03	1.91	20		No	No
33	24.97	82	120	80	151	185	105	50	73	10.53	2.416	0.79	1.9	16	0.24	No	No
32	23.29	71	120	65	90	156	78	60	85	9	2.06	0.92	1.89	18		No	No
50	36.45	111	120	80	70	199	150	35	104	7.3	1.61	1.16	1.87	17		Yes	No
47	29.04	87	130	80	103	229	161	47	91	8.3	1.16	1.61	1.86			No	No
39	25.16	84.8	140	60	152	170	95	45	80	9.4	1.52	1.22	1.86	27	0.98	Yes	No
18	26.14	86	120	80	50	134	66	58	70	10.66	1.361	1.35	1.84	9		No	No
49	25.44	88	104	70	97	208	126	63	76	9.8	1.65	1.11	1.84	12	0.14	No	No
20	22.9	90.5	100	60	116	161	100	38	90	8.18	2.086	0.87	1.82			No	No
35	24.73	95.5	100	60	189	165	73	54	73	9.9	1.86	0.96	1.78	7		No	No
29	27.89	96.5	100	60	143	235	172	34	83	8.7	1.88	0.95	1.78	46		No	No
36	23.01	80	160	100	105	148	92	35	74	9.65	2.065	0.85	1.76	26		Yes	No
27	30.06	90	110	70	180	223	147	40	79	8.91	0.916	1.9	1.74	9	0.26	Yes	No
23	31.43	93.5	116	66	69	175	115	46	90	7.8	2.42	0.72	1.73	19		No	No
32	32.2	101	132	88	53	129	83	36	78	9	2.35	0.74	1.73	24	0.07	Yes	No
44	36.71	100	136	96	88	185	124	43	82	8.5	1.38	1.25	1.72	82		No	No
49	25.88	96.5	90	60	126	197	120	52	73	9.5	1.86	0.92	1.71	25	0.21	No	No
56	29.52	99	114	86	73	159	101	43	80	8.6	2.28	0.75	1.7	32		No	No
31	21.53	79	100	70	98	152	77	55	78	8.8	2.31	0.73	1.69			No	No
45	20.9	79.2	110	80	135	220	144	49	89	7.7	2.34	0.72	1.69	16		No	No
30	23.93	80	110	80	105	178	96	61	81	8.4	2.14	0.79	1.68	9		No	No
29	26.4	86	110	80	189	183	100	45	78	8.63	1.2	1.39	1.66		3.34	No	No
53	33.76	119	120	80	132	198	140	32	112	6	1.97	0.84	1.66	27	0.09	Yes	No
32	36.65	113.5	130	90	105	153	92	40	73	9.2	2.114	0.78	1.66	71	1.08	Yes	No
31	22.19	73	110	68	55	116	61	44	78	8.6	2.26	0.73	1.66	10		No	No
25	25.15	82	100	80	91	160	105	37	73	9.1	1.78	0.92	1.64	27	0.98	No	No
21	33.98	102	118	80	67	172	105	54	75	8.8	1.55	1.05	1.63			No	No
33	26.19	86	110	70	70	144	96	34	81	8.12	1.82	0.89	1.62	15	0.2	No	No
38	23.47	80	120	80	89	110	46	56	87	7.56	1.78	0.91	1.62	12		No	No
18	20.17	67	110	70	118	220	136	60	96	6.75	2.14	0.75	1.6			No	No
30	27.1	87	110	80	99	154	95	39	71	9.1	2.37	0.67	1.6	23	3.99	No	No
50	34.02	112	140	100	287	244	146	41	76	8.5	1.73	0.92	1.6	26		Yes	No
19	20.25	84	110	70	140	183	89	66	75	8.5	2.1	0.75	1.57			No	No
31	23.89	83	114	74	139	205	127	50	81	7.8	1.34	1.16	1.56	23		No	No
46	27.82	98.5	110	70	110	234	164	48	77	8.2	1.89	0.82	1.56		0.13	No	No
53	24.61	94	130	100	209	284	185	57	77	8.1	2.27	0.68	1.54		0.09	Yes	No
24	26.11	87.5	108	69	91	236	156	62	77	8.1	1.9	0.81	1.54	26		No	No
38	33	115.5	130	85	167	187	111	43	82	7.6	1.7	0.91	1.54	30		Yes	No
21	20.41	78	100	70	61	142	81	49	73	8.5	2.09	0.73	1.53			No	No
27	23.24	82	110	60	90	137	89	30	70	8.82	1.702	0.9	1.52	12		No	No
45	45.09	122.6	132	90	73	162	83	64	75	8.2	2.16	0.7	1.52	17	0.3	No	No
37	42.07	110	100	70	42	123			79	7.7	2.42	0.62	1.5			No	No
31	32.84	96.8	122	70	93	165	102	44	74	8.2	1.23	1.22	1.5	23	0.12	No	No
25	27.47	94	110	80	156	207	106	70	73	8.3	1.92	0.78	1.5	11		No	No
29	23.71	80.5	110	80	55	114	65	38	75	8.07	1.9	0.79	1.49		0.46	No	No
56	27.81	81	120	90	46	164	110	45	86	7.03	2.24	0.67	1.49	14	0.11	Yes	No
53	24.69	91	107	80	111	195	124	49	102	5.9	2.27	0.65	1.49	30		Yes	No
33	45.95	132	130	90	71	175	113	48	76	7.8	2.42	0.6	1.46	47	1.36	Yes	No
30	48.4	128	140	100	100	184	117	47	72	8.2	1.14	1.28	1.46	21		No	No
22	22.05	86	110	70	72	212	141	57	83	7.1	2.13	0.68	1.46			No	No
50	26.75	87	140	94	132	215	137	51	87	6.7	2.204	0.65	1.44	16		No	No
47	37.94	125	120	80	95	159	95	45	84	6.9	2.078	0.69	1.43	16		No	No
23	23.73	81	120	80	98	170	97	54	71	8	1.76	0.8	1.4			No	No
31	27.61	90	120	83	136	284	198	59	76	7.3	2.3	0.6	1.37	18	0.14	No	No
47	28.54	91	120	90	103	129	55	53	97	5.71	1.8	0.76	1.37			No	No
28	31.33	104.3	100	70	81	178	119	43	85	6.4	1.04	1.29	1.34	21		No	No
41	24.59	93	100	60	83	232	159	56	82	6.5	2.16	0.61	1.32	59		No	No
34	22.98	62	113	70	117	161	69	69	72	7.4	1.27	1.04	1.32	22		No	No
41	31.09	99	126	80	78	171	109	46	85	6.2	1.85	0.7	1.3	14		Yes	No
57	32.39	98	120	80	101	204	138	62	121	4.3	1.73	0.74	1.28	76	0.55	No	No
34	22.59	76	110	70	106	185	65	99	89	5.83	2.082	0.62	1.28		6.32	No	No
54	24.23	89.5	160	85	145	202	130	43	98	5.26	2.3	0.55	1.27			Yes	No
55	27.24	100	130	90	98	257	185	52	89	5.7	1.11	1.13	1.25	13	0.56	No	No
20	20.43	80	100	65	65	160	105	35	76	6.66	2.262	0.55	1.25	13	0.23	No	No
46	25.75	88	120	80	96	189	116	54	79	6.4	1.6	0.78	1.25	26		No	No
43	29.74	104.5	130	90	66	144	71	60	77	6.45	1.7	0.72	1.22	17	0.51	No	No
20	27.72	80	100	70	90	184	105	61	78	6.3	1.58	0.77	1.21			No	No
30	31.8	96	120	70	113	190	131	36	73	6.63	1.83	0.65	1.2	7	0.48	No	No
35	23.53	87	100	65	83	226	159	50	74	6.5	1.77	0.67	1.19			No	No
21	30.47	78	120	80	74	184	115	54	82	5.8	1.44	0.82	1.17			No	No
21	41.29	104	130	80	120	187	125	38	73	6.4	1.75	0.66	1.15	22	0.61	No	No
47	25.39	84	130	80	86	160	84	59	74	6.2	2.22	0.51	1.13	10		Yes	No
46	39.38	114	140	90	114	199	131	45	77	5.9	1.71	0.66	1.12	17		Yes	No
18	25.51	67	120	70	62	221	123	86	87	5.2	2.28	0.49	1.12			No	No
29	21.06	73	120	80	74	186	117	54	75	5.9	1.27	0.86	1.09	15	0.26	No	No
34	38.1	109	110	70	62	158	88	58	90	4.89	2.186	0.5	1.09	45		No	No
28	34.97	118.5	110	80	76	119	70	34	83	5.3	1.17	0.93	1.09	17	0.58	No	No
24	25.03	88.2	120	74	87	192	86	89	72	6.1	2.04	0.53	1.08	10	0.58	No	No
24	27.55	98	110	60	69	168	111	43	89	4.9	2.04	0.53	1.08	23	0.58	No	No
56	24.29	86	130	90	92	171	75	78	92	4.7	1.25	0.85	1.07	123		No	No
54	28.43	93	130	73	105	240	174	48	68	6.3	2.15	0.49	1.06	18		No	No
47	25.29	88	110	70	100	207	131	56	72	5.8	1.54	0.67	1.03	26	0.09	No	No
32	25.83	96.4	120	80	67	116	49	54	73	5.52	1.27	0.78	0.99	11	0.12	No	No
22	24.06	77.5	110	70	82	254	144	94	77	5.1	1.79	0.54	0.97	14	0.66	No	No
35	24.73	83.2	110	70	45	153	89	55	75	5.2	1.43	0.67	0.96	6		No	No
49	25.24	92	110	80	203	263	167	55	77	5	1.84	0.52	0.95	18	0.16	No	No
40	26.91		120	80	82	172	103	53	83	4.59	2.07	0.46	0.94	16			No
53	22.62	80	120	80	69	184	102	68	80	4.6	2.23	0.41	0.91	27		No	No
31	24.35	95	100	60	124	202	138	39	70	5.2	1.13	0.8	0.9	17		No	No
52	34.26	101	120	90	92	178	108	52	89	4	1.47	0.6	0.88	16	0.46	No	No
26	32.2	97	120	90	106	241	170	50	73	4.8	1.02	0.85	0.87	18	0.35	No	No
33	23.44	79	110	70	52	233	157	66	87	3.94	1.4	0.6	0.85		0.63	No	No
51	33.61	99.8	125	61	134	141	64	50	103	3.13	2.09	0.38	0.8			Yes	No
44	30.2	87.5	120	80	70	200	124	62	84	3.8	0.8	0.99	0.79	7	0.02	No	No
44	44.23	113.2	140	90	117	146	91	32	84	3.6	2.33	0.32	0.75	12	1.24	Yes	No
55	25.95	87.5	112	79	139	229	150	51	74	4	2.33	0.31	0.73	16	0.29	No	No
36	23.32	82	100	60	68	192	116	62	74	3.9	1.79	0.4	0.71	37		No	No
50	26.67	90	120	80	160	199	123	44	73	3.9	1.244	0.57	0.7	12		Yes	No
60	30.68	103	115	76	56	164	115	38	86	3.3	0.98	0.72	0.7	13		Yes	No
37	30.86	104.8	110	80					94	3	1.56	0.45	0.7				No
42	25.35	85	100	70	59	188	127	49	76	3.6	1.52	0.44	0.68	20	0.06	No	No
58	28.55	92.8	130	80	89	204	126	60	85	3.2	1.34	0.5	0.67	19		No	No
22	20.94	80	120	80	54	150	93	46	82	3.12	2.132	0.3	0.63	21	0.1	No	No
48	28.22	92.3	104	56	97	254	181	54	88	2.87	2.36	0.26	0.62			No	No
25	23.51	82.5	120	70	147	199	130	40	82	2.9	1.98	0.3	0.59			No	No
44	22.84	84	110	70	36	169	98	64	75	3.1	2.27	0.25	0.57	10	0.03	No	No
23	27.2	88	100	70	38	134	78	48	79	2.9	1.74	0.33	0.57			No	No
35	23.61	83	120	80	50	153	97	46	72	2.41	2.013	0.21	0.43	11		No	No
41	21.37	82	80	50	64	184	124	47	80	2	1.23	0.32	0.4	13		No	No
36	30.88	99.3	120	80	131	182	116	40	68	2.18	1.843	0.2	0.37	23	0.16	No	No
31	35.26	107	130	90	502	228	95	33	78	1.8	0.91	0.38	0.35	69		Yes	No
42	36.04	103.5	120	90	148	258	187	41	84	1.6	2.08	0.16	0.33	11	0.27	No	No
36	49.65	123	120	90	182	140	72	32	125	54.8	1.82	9.29	16.91	46	0.88	Yes	No
40	42.13	121.5	127	90	159	204	133	39	98	57.83	2.3	6.1	14.03	71	2.56	Yes	No
38	40.36	110			114	186	120	43	95	53	1.878	6.62	12.43			Yes	No
31	49.6	134	130	90	282	183	89	38	109	38.08	0.98	10.46	10.25	23	0.26	Yes	No
57	36.05	137	170	100	416	388	245	60	101	38.91	1.796	5.4	9.7	172	0.26	Yes	No
36	41.91		150	90	261			32	95	35	1.6	5.13	8.21	41			No
26	49.23	130	167	123	97	103	41	43	103	32.2	1.85	4.43	8.19	74	0.38	Yes	No
51	38.31	113	156	95	79	217	165	36	111	29.5	1.73	4.67	8.09	48		Yes	No
31	40.93	112			88	129	83	28	75	43	2.352	3.39	7.96		0.08	No	No
28	40.77	118	130	90	129	181	115	40	86	33.7	2	3.58	7.16	25	0.31	Yes	No
31	40.55	123.5	130	110	94	184	120	45	105	26.7	2.17	3.19	6.92	74		Yes	No
19	28.52	103	120	80	70	219	172	33	93	28.1	1.98	3.26	6.45			No	No
63	44.37	113	115	80	209	284	202	40	100	25.6	1.98	3.19	6.32			Yes	No
39	32.34	103.7	110	80	200	151	86	55	86	28.6	1.39	4.37	6.07	25		No	No
26	47.91	126	120	80	202	170	60	70	113	21.23	1.78	3.33	5.92	14	1.51	Yes	No
56	35.7	119.6	170	110	213	192	113	36	96	23.32	1.75	3.16	5.53	67	4.6	Yes	No
57	36.79	112	140	80	119	192	104	48	96	22.75	2.394	2.25	5.39	17		Yes	No
51	45.2	121.5	120	90	64	110	58	40	87	24.5	1.28	4.11	5.26			Yes	No
27	41.7	124	125	75	179	182	107	39	80	26.23	2.24	2.31	5.18	37	0.57	Yes	No
37	26.64	94	100	70	149	246	180	36	79	26.4	1.41	3.65	5.15	17		No	No
23	25.15	83	113	73	253	236	140	46	113	18.23	2.29	2.22	5.09			Yes	No
22	49.76	108	120	90	86	193	132	44	98	20.5	2.31	2.15	4.96	25	0.31	Yes	No
38	45.27	124	130	90	151	212	148	34	91	21.6	2.34	2.07	4.85	109	1.39	Yes	No
48	29.83	102.5	130	90	349	196	93	33	101	19.38	2.061	2.35	4.85	103	0.86	Yes	No
40	29.31	91	120	74	136	208	128	53	91	21.5	2.23	2.17	4.83	32	0.24	No	No
23	34.53	115	130	70	150	162	103	30	103	18.87	1.47	3.26	4.8		14.59	Yes	No
40	31.6	104	100	70	84	149	86	46	87	22.1	1.27	3.74	4.75	15	0.34	No	No
22	23.14	87	110	70	38	184	99	77	98	19.4	1.82	2.58	4.69			No	No
41	36.54	106	140	80	218	169	79	46	93	20.1	0.91	5.07	4.62	109		Yes	No
34	31.25	95	100	70	108	147	79	46	88	21.2	2.24	2.06	4.61	30	0.35	No	No
40	47.7	122	130	110	75	173	120	38	74	25.1	2.21	2.08	4.59	40	1.21	Yes	No
40	31.62	98	120	90	125	181	113	43	93	19.9	1.298	3.52	4.57	30		Yes	No
42	39.89	109	100	60	110	284	213	49	77	23.6	2.31	1.94	4.49	16	0.81	No	No
29	30.5	95	113	65					109	16.4	1.61	2.74	4.41	25		No	No
46	40.98	132.7	132	110	142	211	143	40	74	24	1.33	3.3	4.39		0.52	Yes	No
60	29.55	102	176	92	176	221	145	41	101	17.3	1.84	2.34	4.31	24		Yes	No
56	33.27	105	170	95	107	272	190	61	90	19.4	1.71	2.52	4.31			No	No
42	35.09	113	120	90	62	163	112	39	86	19.8	1.48	2.84	4.2	12	0.35	No	No
39	49.12	114	130	80	113	185	111	51	104	16.1	2.29	1.81	4.13	46	2.38	No	No
31	40.22	108	150	100	114	205	120	62	82	20.26	2.3	1.78	4.1		15.31	No	No
31	40.22	108	150	100	114	205	120	62	82	20.26	1.43	2.87	4.1		15.31	No	No
29	34.1	100	124	88	169	212	130	48	76	21.8	1.69	2.42	4.09	19	0.3	Yes	No
46	27.42	95.5	110	70	119	249	179	46	98	16.8	2.36	1.72	4.07	32	0.07	No	No
53	34.58	117	120	80	413	267	141	43	99	16.44	1.987	2.02	4.02	35		Yes	No
20	25.09	91	110	70	84	187	116	54	91	17.7	1.83	2.17	3.98			No	No
41	38.21	89	137	83	129	239	162	51	108	14.9	2.23	1.78	3.97	28		Yes	No
53	31.17	100	115	90	220	249	163	42	78	19.9	0.95	4.03	3.83	16	0.09	Yes	No
60	36.23	106	131	72	125	191	117	49	100	15.5	1.57	2.44	3.83	17		Yes	No
33	44.65	116	130	80	90	188	136	34	80	19.2	1.27	2.99	3.79	25	0.21	Yes	No
51	27.43	101	120	70	89	176	103	55	111	13.78	1.862	2.03	3.78	10	0.2	No	No
45	33.95	102.8	120	80	85	201	119	65	92	16.5	1.97	1.9	3.75	15	0.69	No	No
41	37.48	110	140	90	142	218	153	37	74	20.5	1.3	2.88	3.75	21	0.09	Yes	No
26	46.4	122	160	90	45	121	73	39	88	17.13	2.41	1.54	3.72	21		Yes	No
33	33.53	110	110	70	82	164	120	27	80	18.8	2.298	1.62	3.71	25	0.22	No	No
26	31.1	93	120	80	60	137	76	49	80	18.3	1.91	1.89	3.61	12	0.47	No	No
54	33.98	110	130	80	155	198	130	37	96	15.2	1.174	3.07	3.6	20	0.21	Yes	No
48	40.15	124	160	105	95	187	112	56	84	17.2	2.16	1.65	3.57	37		No	No
26	48.15	130	150	96	116	161	90	48	77	18.6	2.16	1.64	3.54	18		No	No
31	32.3	95.5	120	80	88	160	101	41	84	16.84	2.037	1.72	3.51	126	0.54	Yes	No
19	27.89	96	120	80	91	161	107	36	77	18.2	1.11	3.12	3.46			No	No
38	34.66	103	120	80	253	183	89	43	83	16.77	2.39	1.44	3.44	26	0.33	No	No
34	29.43	96	120	80	351	214	106	38	87	15.9	1.13	3.02	3.42			Yes	No
19	28.2	103	100	60	96	188	135	34	72	19	2.41	1.4	3.38	18		No	No
22	24.46	84	100	60	110	158	80	56	71	19.2	2	1.68	3.37			No	No
31	28.84	99	120	80	129	214	129	59	98	13.91	1.6	2.1	3.37			No	No
47	32.74	112	122	84	89	205	129	58	73	18.5	1.72	1.94	3.33	66	0.35	No	No
41	27.33	96.6	120	78	97	277	203	55	85	15.7	2.26	1.46	3.3	15	0.09	No	No
42	28.27	92.5	100	60	56	168	113	44	79	16.8	1.25	2.62	3.28	28		No	No
52	32.84	110	110	70	94	144	87	38	95	13.9	0.8	4.08	3.26	20	0.16	No	No
35	41.07	92	110	70	189	225	150	38	90	14.64	2.314	1.41	3.25		6.96	Yes	No
23	43.28	134	130	86	265	254	155	46	80	16.4	1.33	2.44	3.24	43		Yes	No
51	29.8	89.5	128	84	208	224	124	58	86	15.2	1.77	1.82	3.23	12	2.24	No	No
58	35.49	108	112	73	153	177	118	45	98	13.3	1.54	2.09	3.22	26		Yes	No
25	25.04	74	114	84	74	162	98	49	77	16.7	1.03	3.08	3.18			No	No
32	27.58	99	110	65	99	232	138	74	77	16.6	1.85	1.71	3.16	40	0.4	No	No
32	34.6	110	100	60	163	189	122	34	87	14.6	1.13	2.78	3.14	18	0.7	Yes	No
34	35.03	101	100	60	241	289	202	39	79	16	1.77	1.76	3.12	52	2.65	Yes	No
23	43.03	108	120	90	74	125	67	43	84	15	2	1.56	3.11	15	2.04	Yes	No
48	38.87	114.5	100	70	281	261	165	40	72	17.5	1.19	2.61	3.11	19		No	No
56	28.04	91	140	90	121	230	165	41	89	14.1	1.27	2.44	3.1	20	0.31	Yes	No
26	24.29	75.5	110	62	143	231	139	63	76	16.5	2.09	1.48	3.1			No	No
37	25.76	77	120	80	95	166	108	39	79	15.69	1.704	1.8	3.06		0.42	No	No
41	26.03	95	130	70	287	140	35	48	82	15.1	1.61	1.9	3.06	173	0.05	Yes	No
33	31.6	98	167	110	119	176	126	27	98	12.6	1.22	2.5	3.05	40		Yes	No
46	36.09	110.6	120	80	50	165	104	51	81	15.2	1.52	2	3.04	46		No	No
20	34.37	111	110	70	142	187	115	44	81	15	1.91	1.57	3			No	No
19	22.06	69	130	70	209	233	131	60	80	15.1	1.56	1.91	2.98			No	No
48	31.94	118	100	60	180	229	147	46	98	12.1	1.142	2.56	2.93	21	13.8	Yes	No
56	37.32	99.5	150	85	74	210	119	76	82	14.3	2.39	1.21	2.9	35	0.36	No	No
22	27.02	92	110	70	116	184	117	44	75	15.6	2.03	1.42	2.89			No	No
29	23.91	69	110	60	49	203	130	63	79	14.6	1.23	2.32	2.85	24		No	No
55	28.39	99	114	80	70			76	93	12.4	1.82	1.56	2.85	25		No	No
40	28.28	94.6	130	110	295	234	122	53	73	15.7	1.72	1.65	2.83	13	0.95	No	No
45	41.06	124	131	94	199	215	149	26	88	12.9	1.434	1.95	2.8	22		No	No
30	44.56	132	140	90	112	201	113	66	94	12	1.25	2.23	2.79	197	1.01	No	No
28	22.19	74	110	70	81	138	79	43	86	13.06	2.1	1.32	2.77		2.95	No	No
65	27.06	90	160	80	130	186	125	35	109	10.3	1.93	1.44	2.77	12		Yes	No
